# Supplementary material
Source: PubMed Central journal article supplement (PMC10755079)
Supplement: NIHMS1906709-supplement-Supplemental_Data_File___doc___tif__pdf__etc__.pdf [file NIHMS1906709-supplement-Supplemental_Data_File___doc___tif__pdf__etc__.pdf]

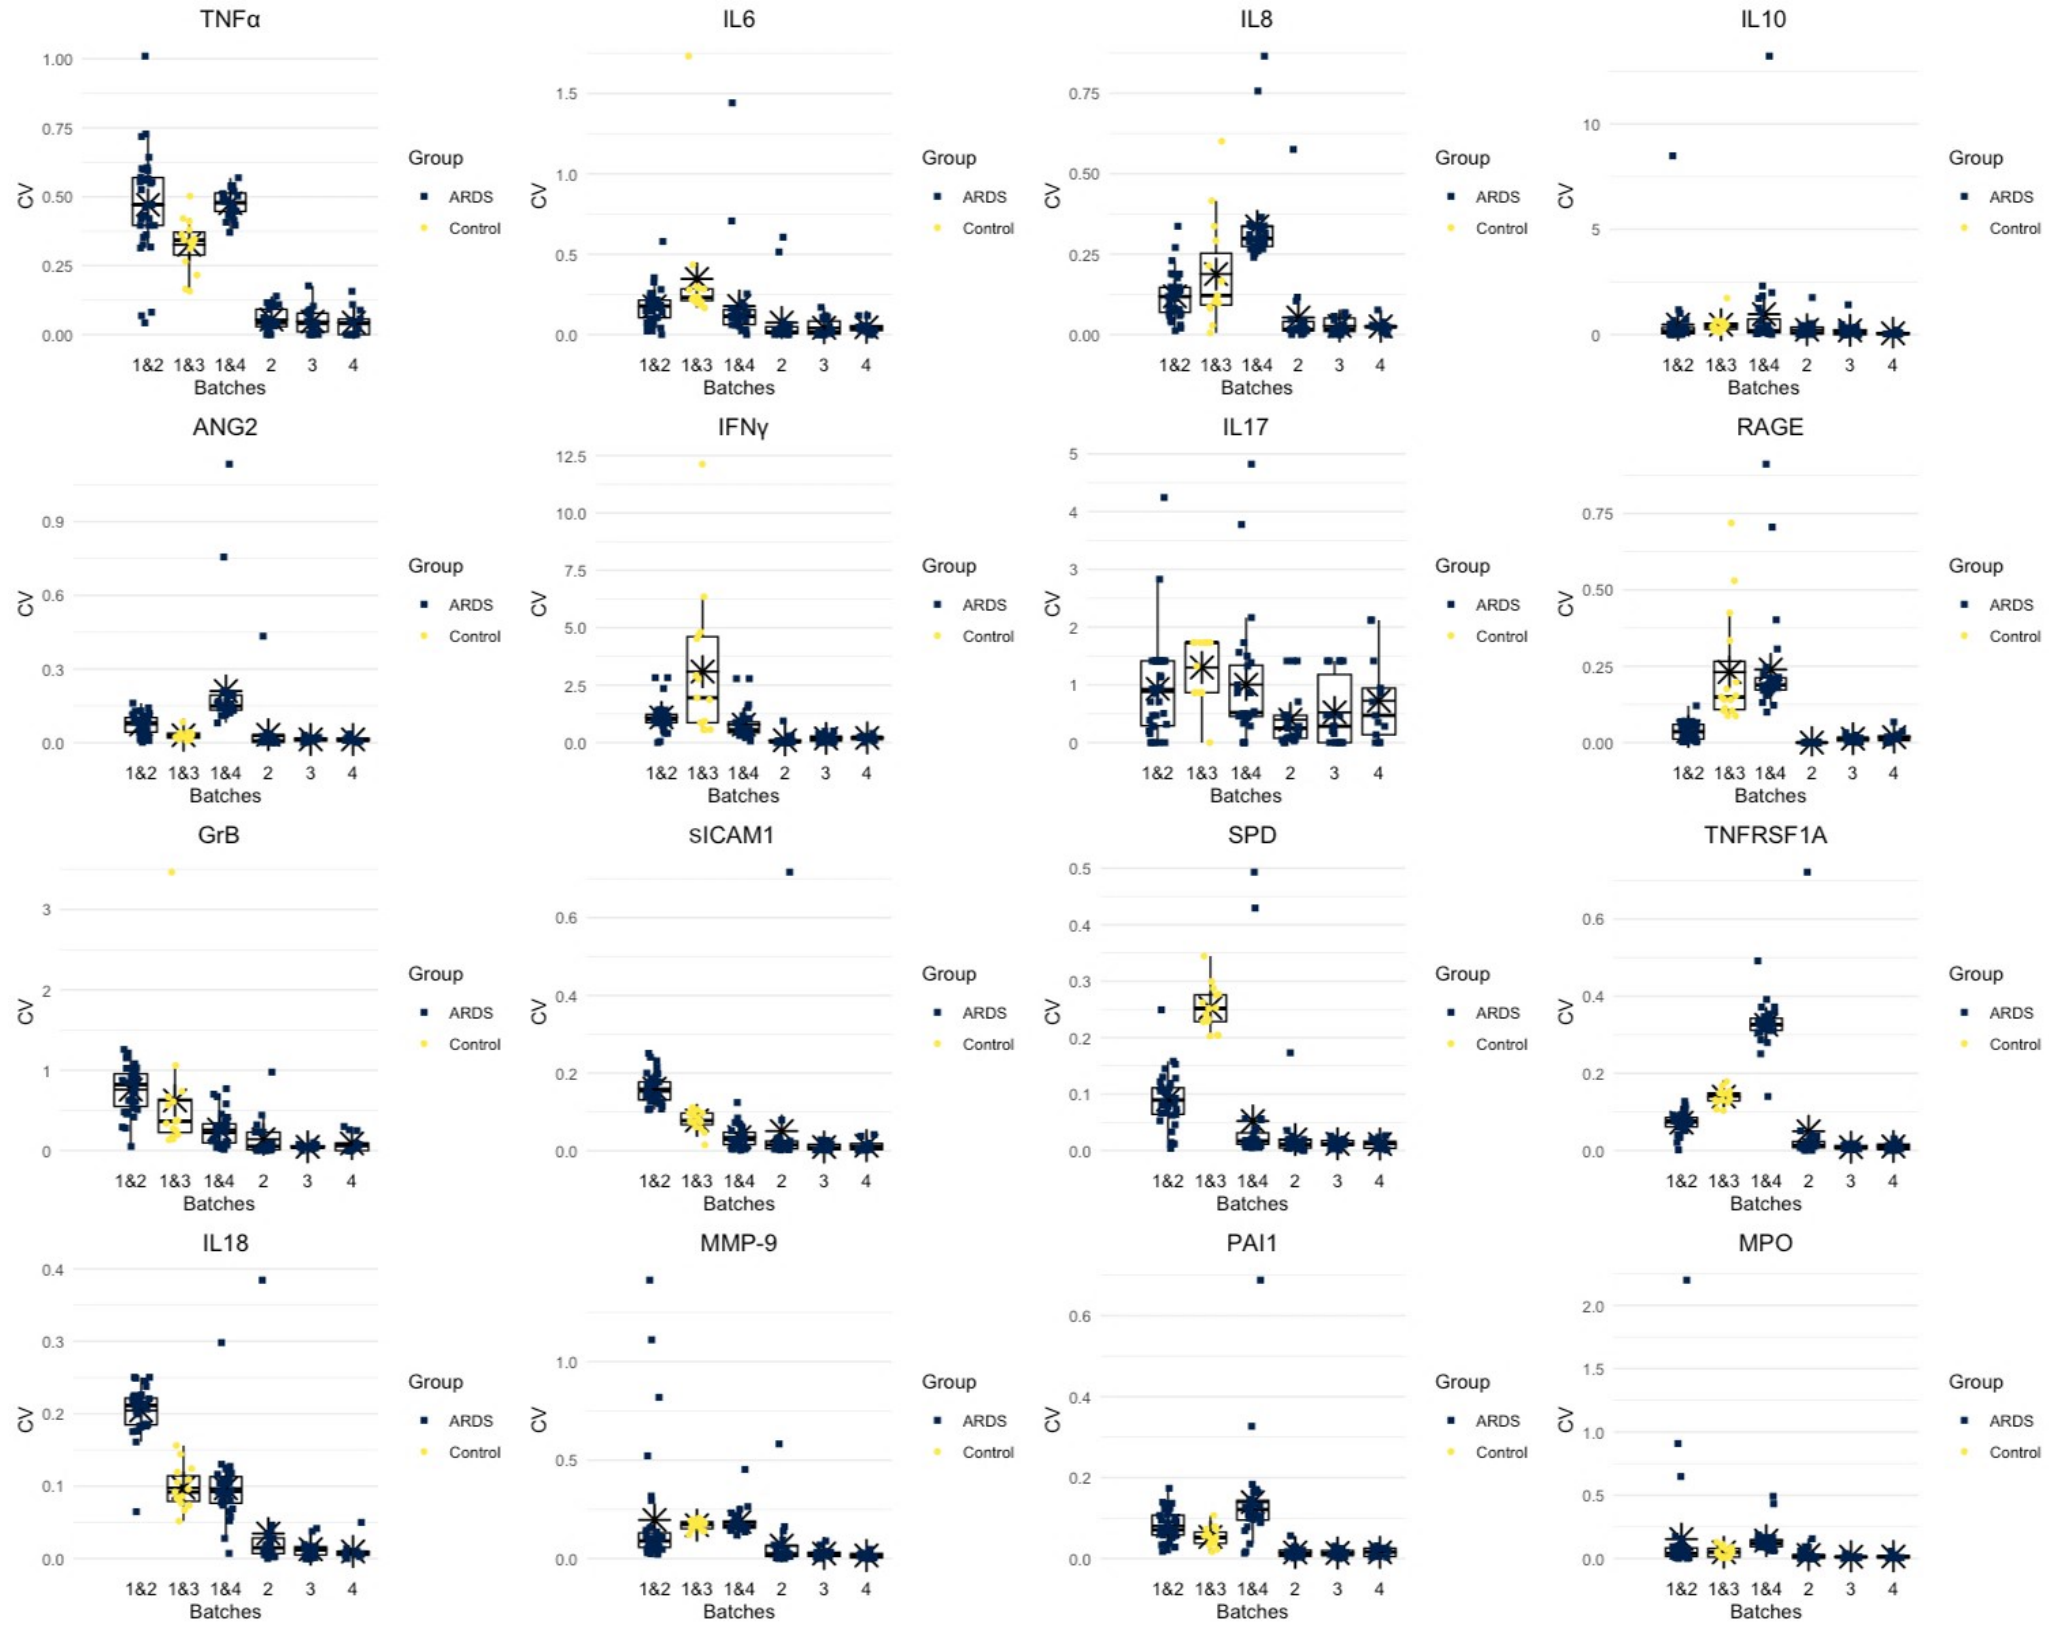

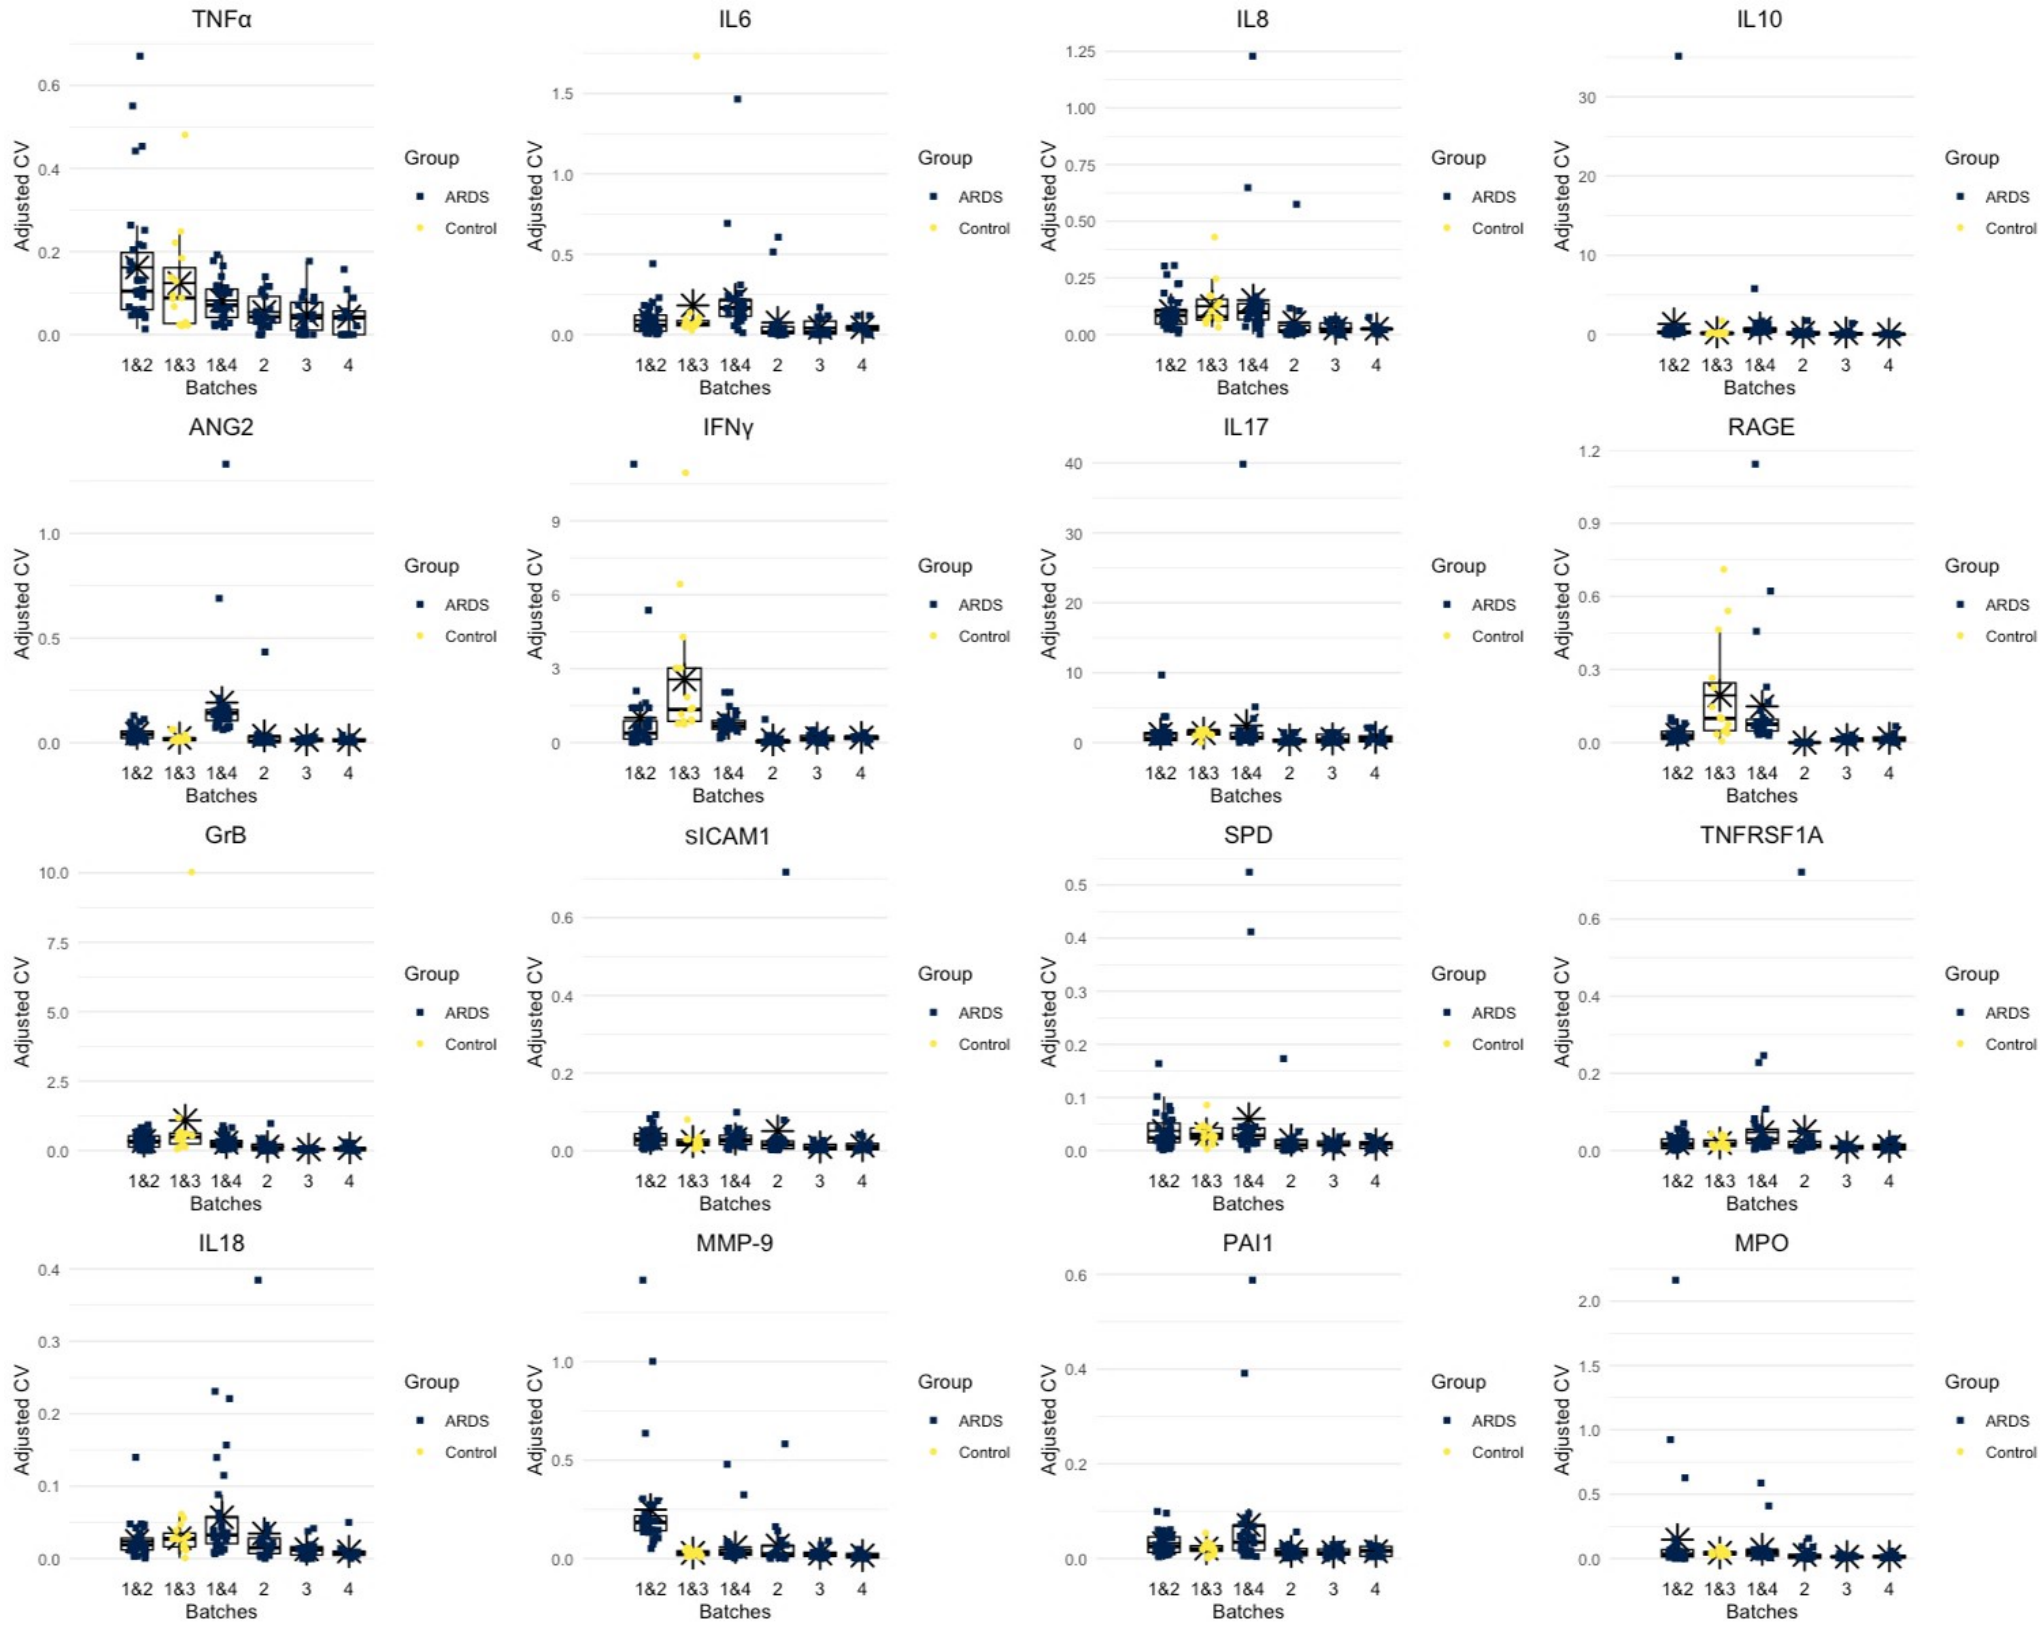

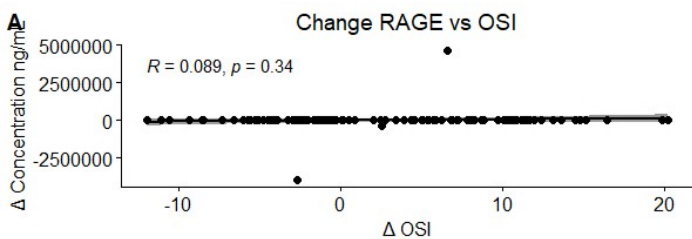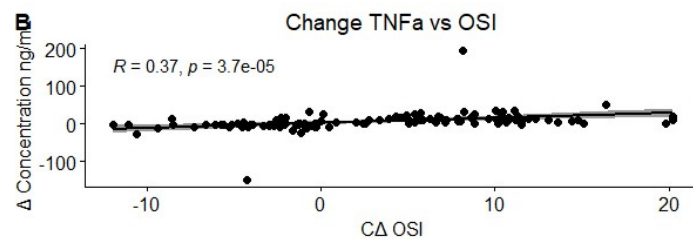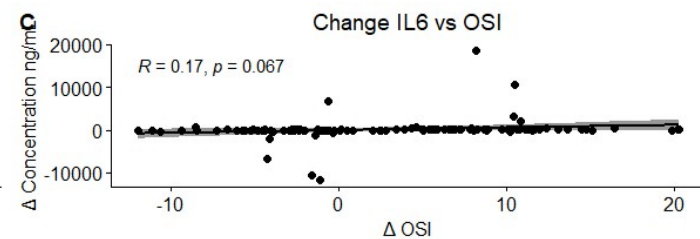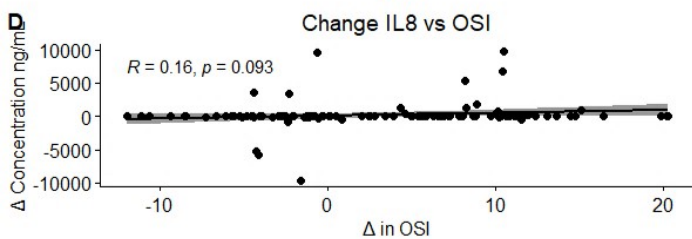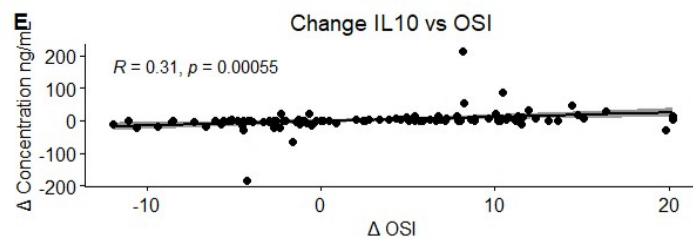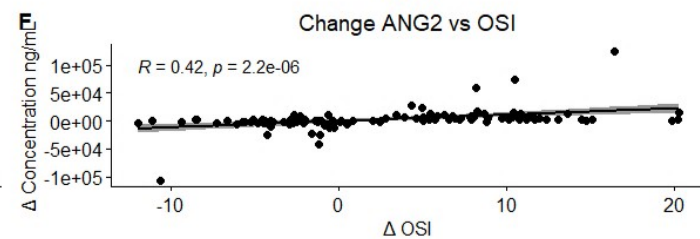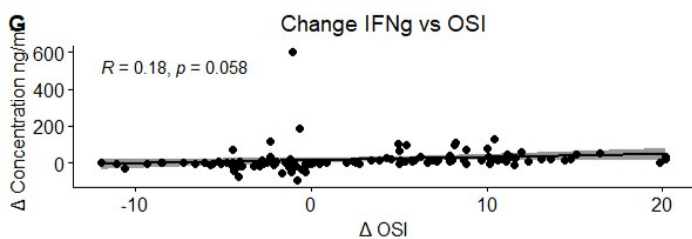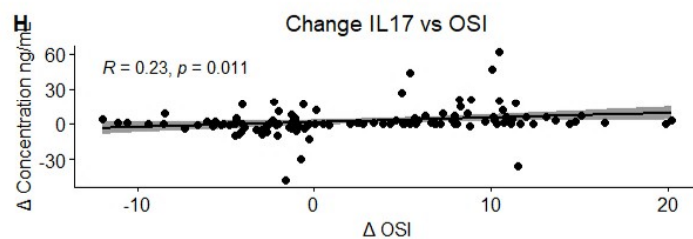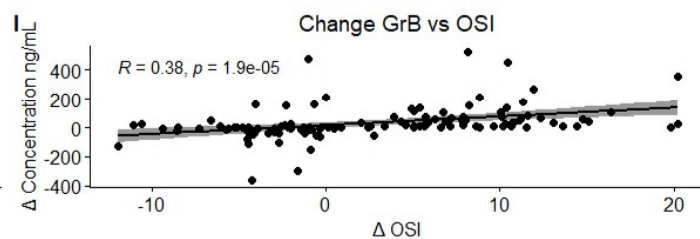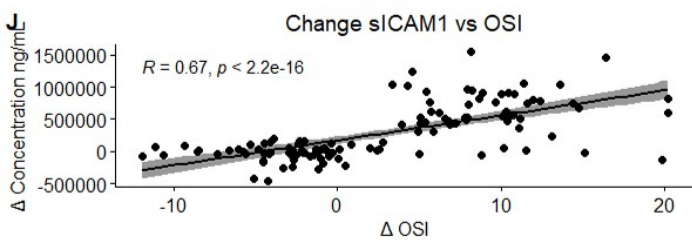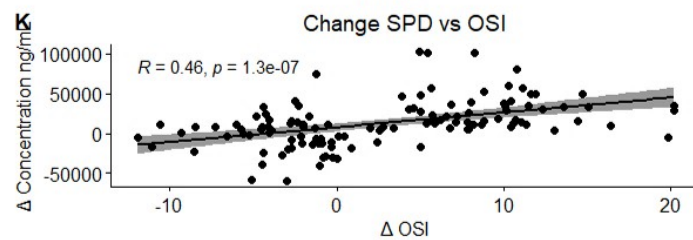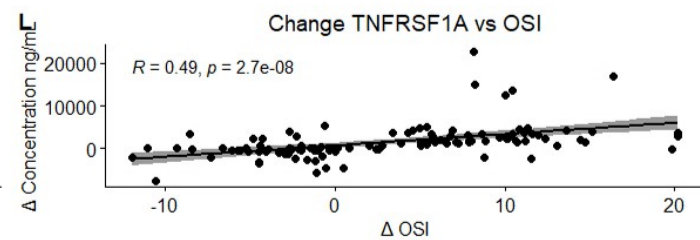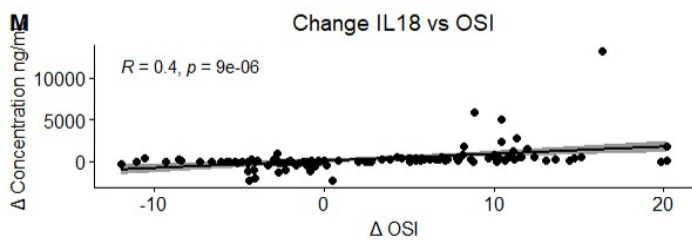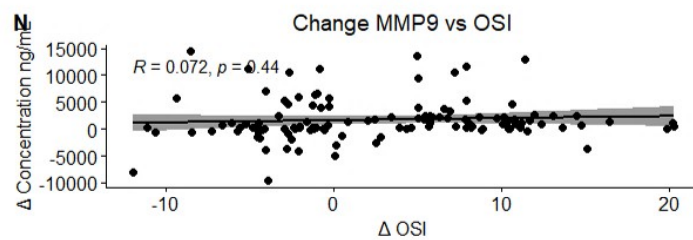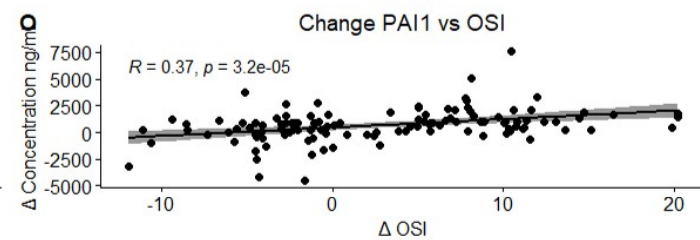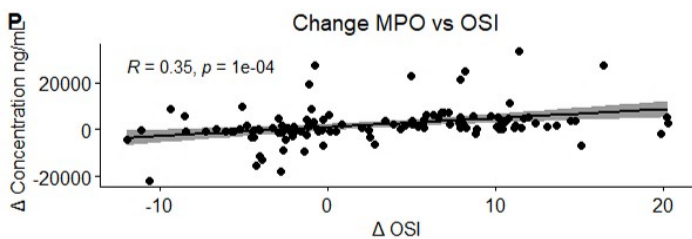

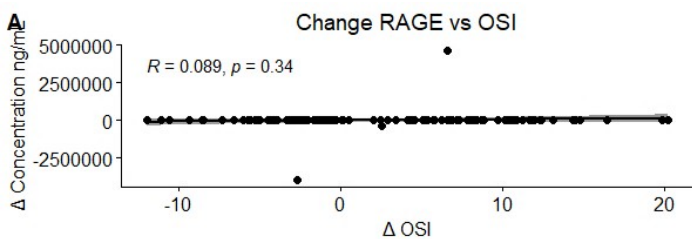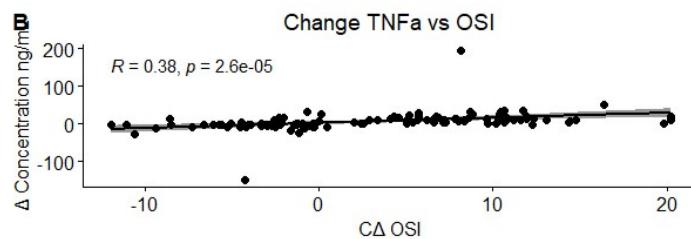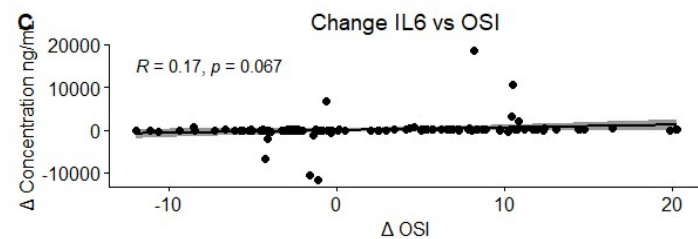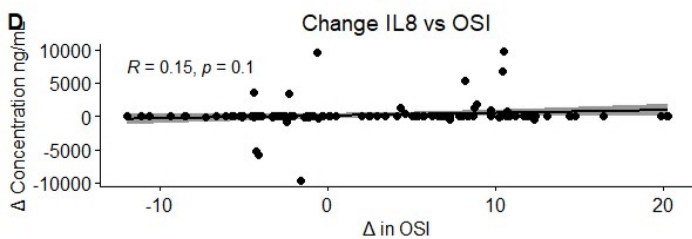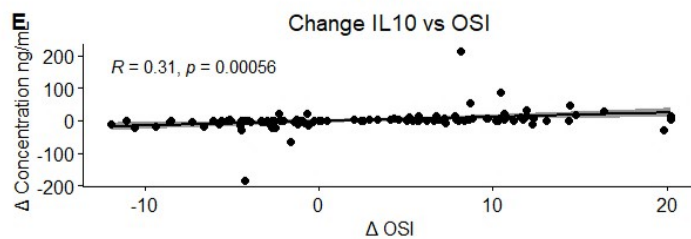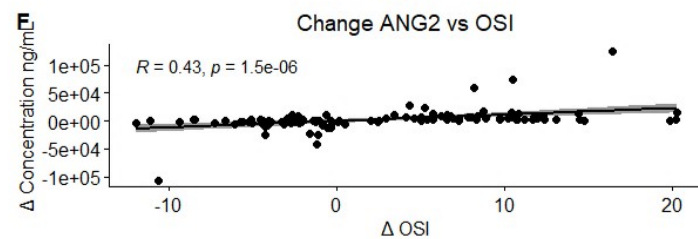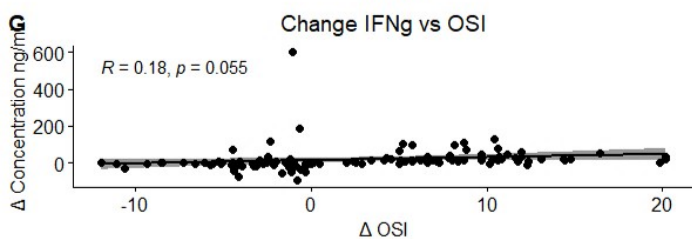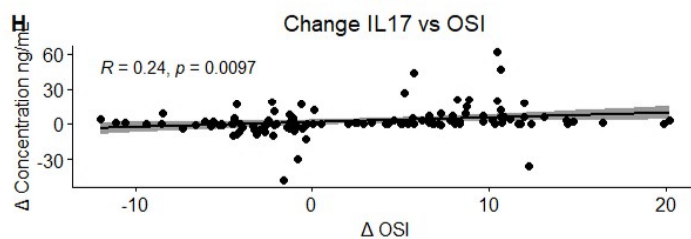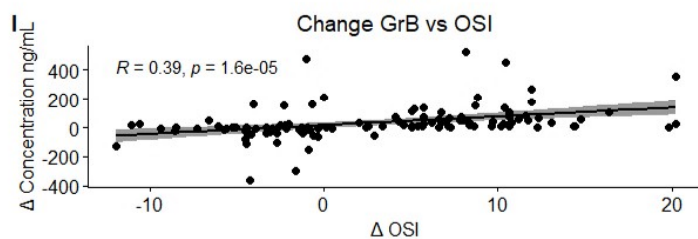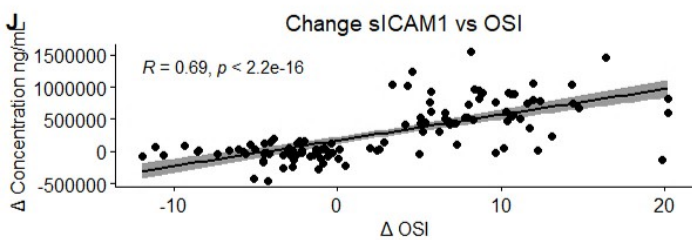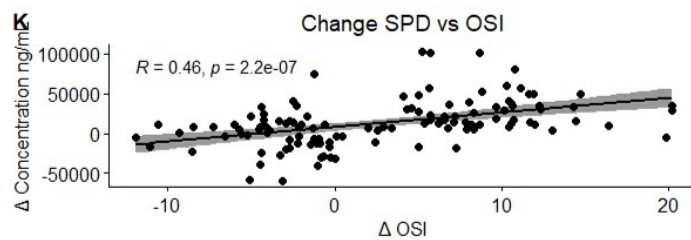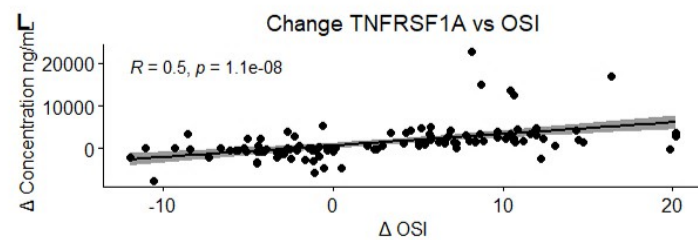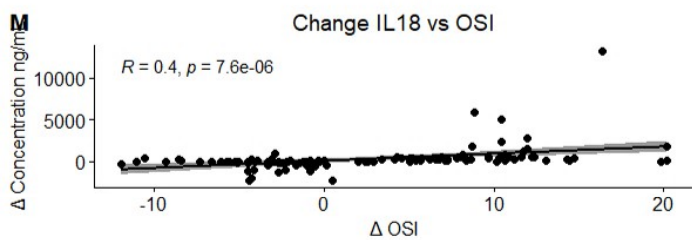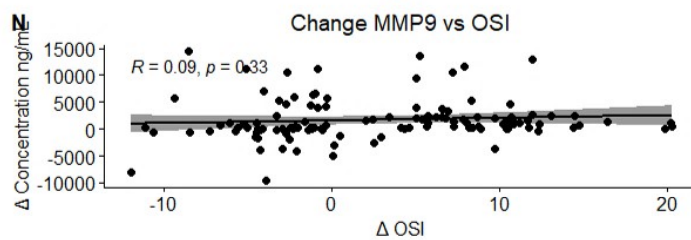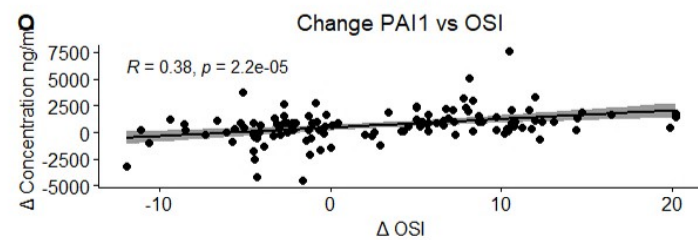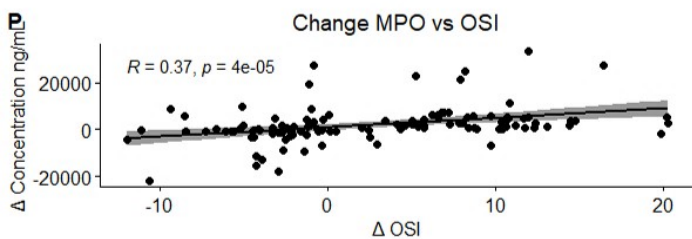

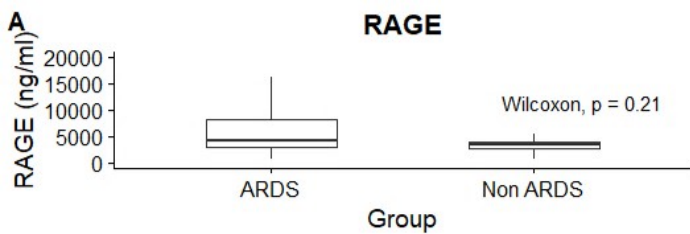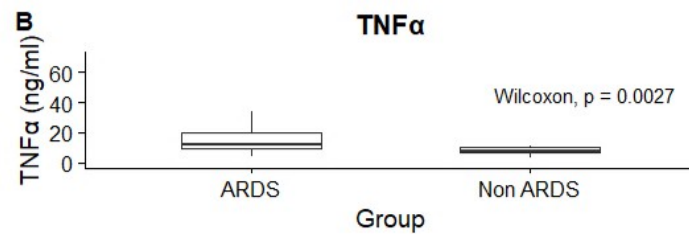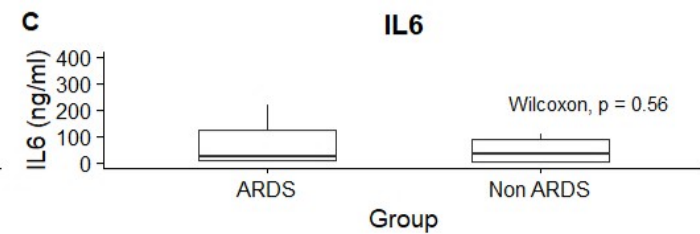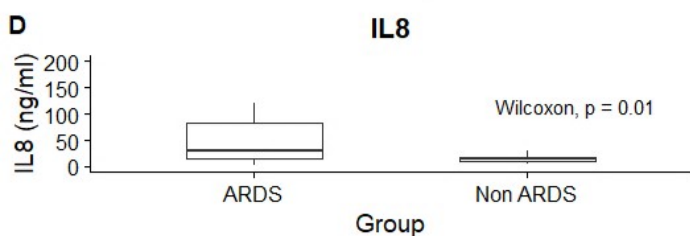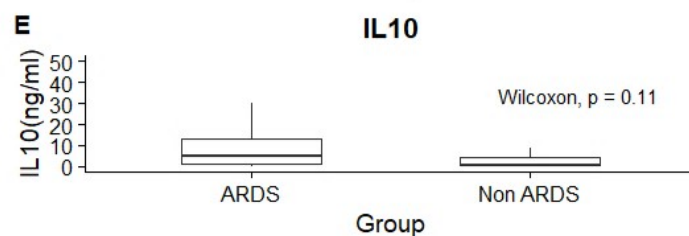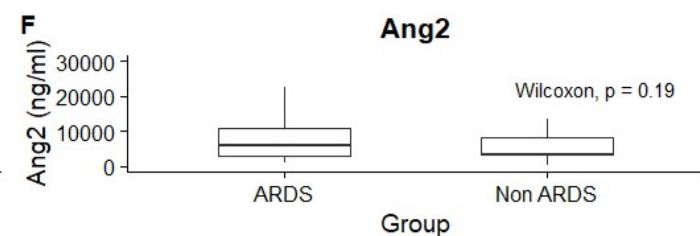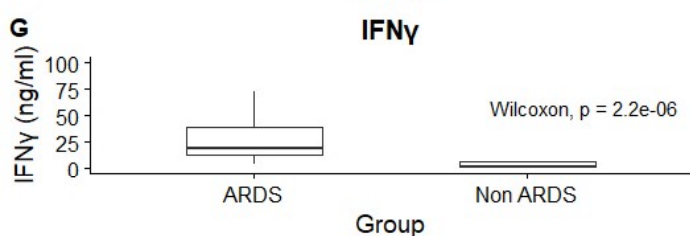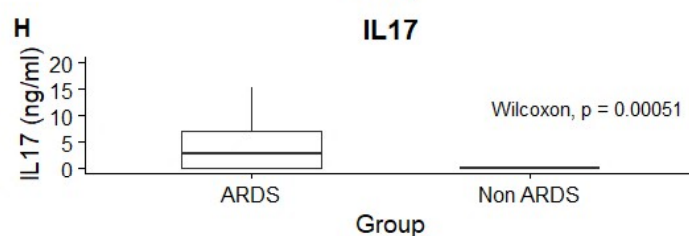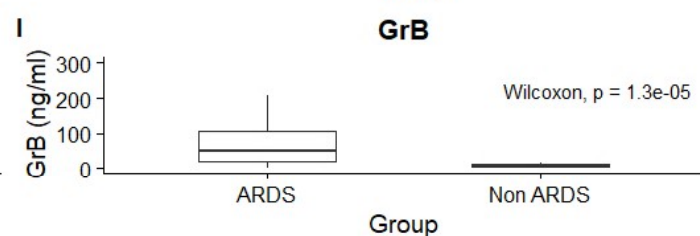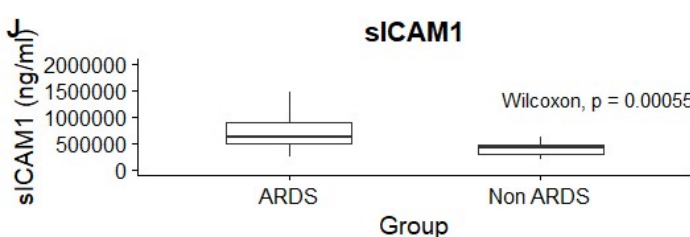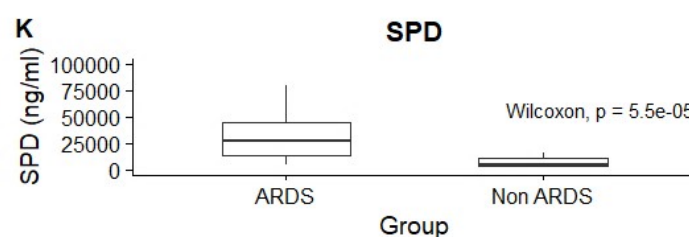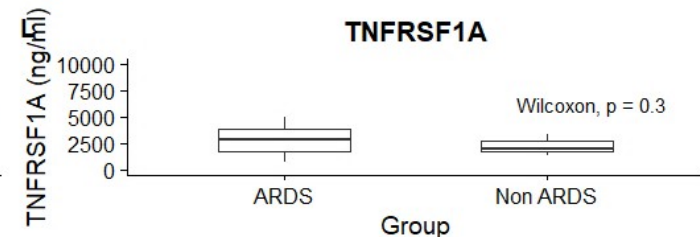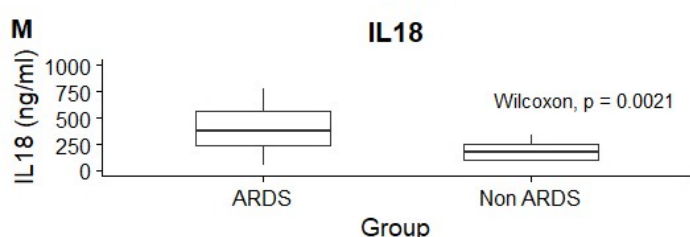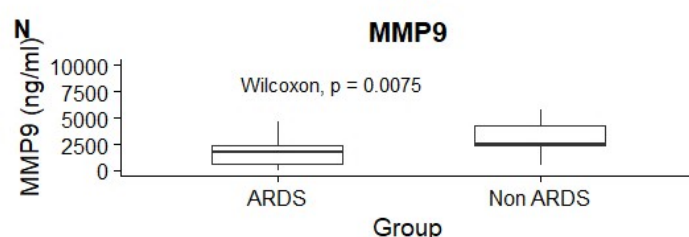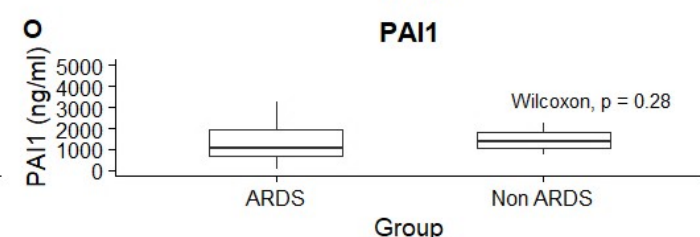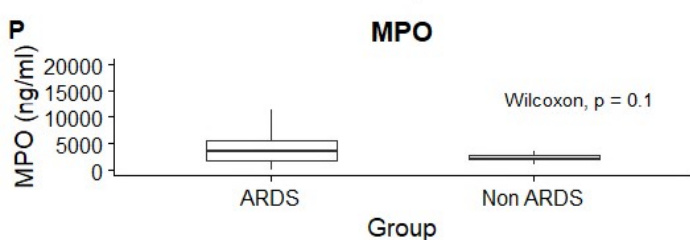

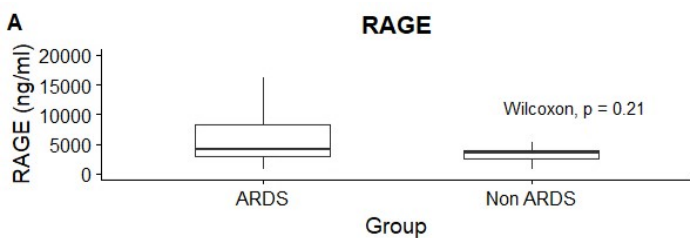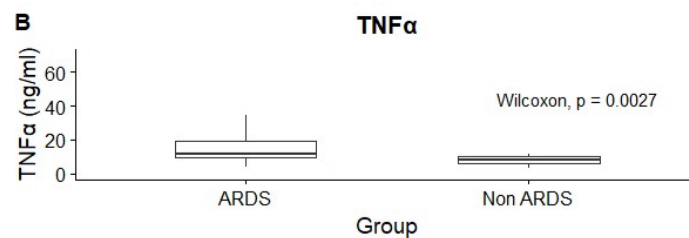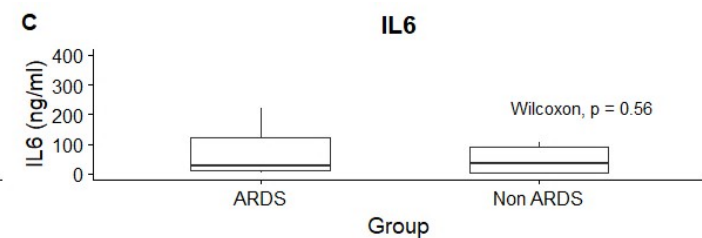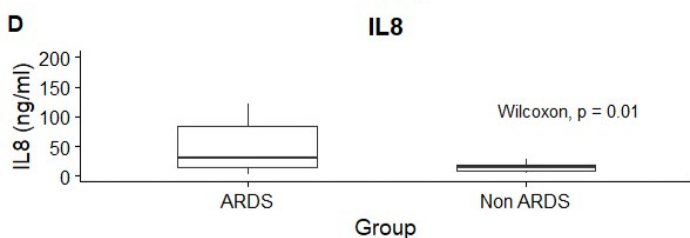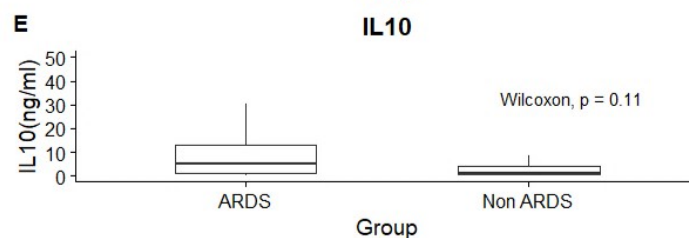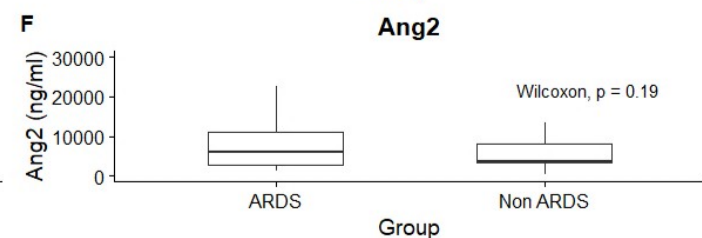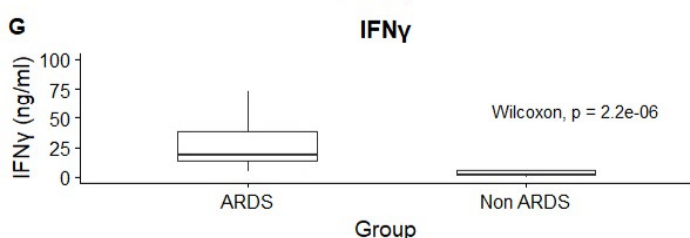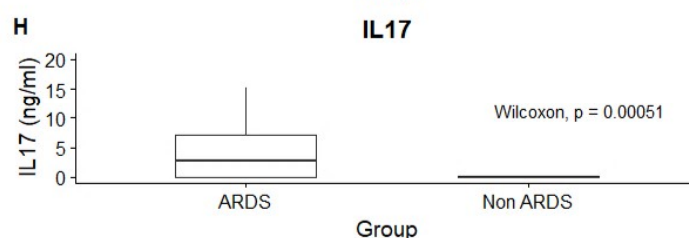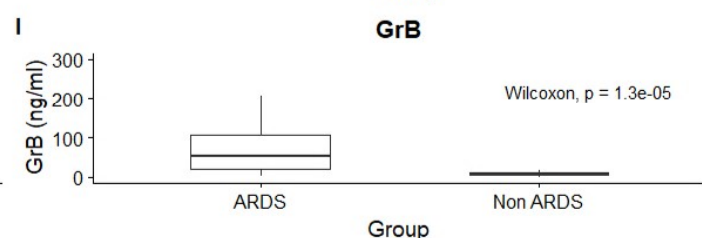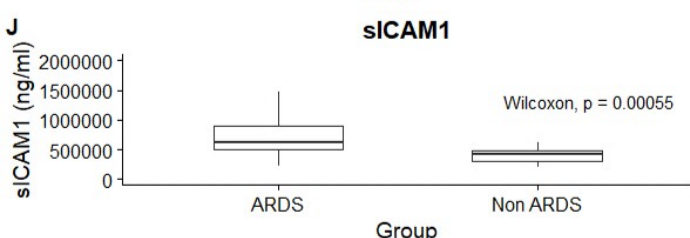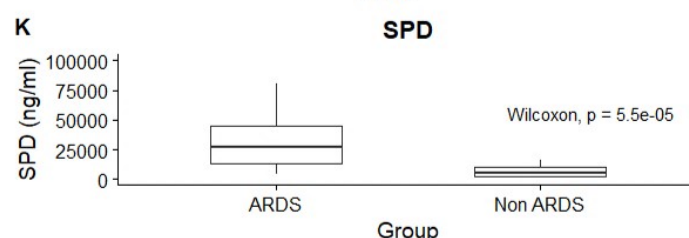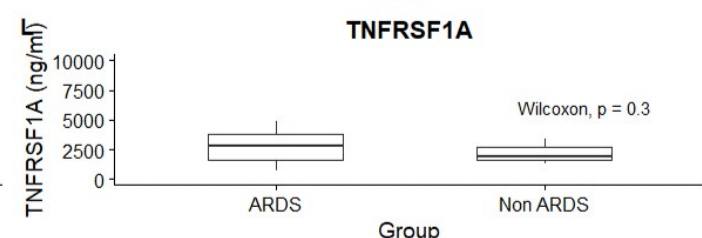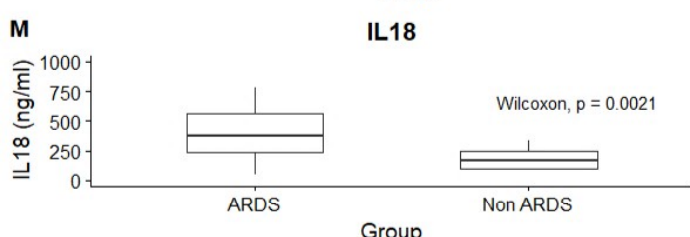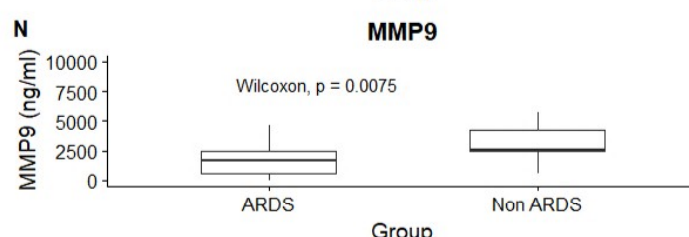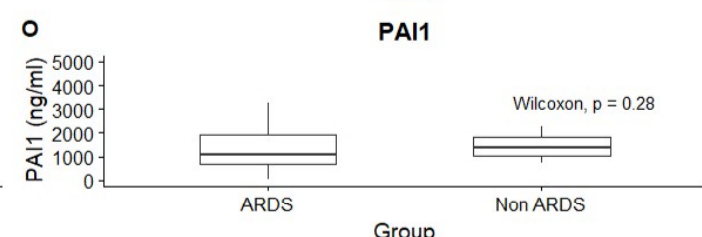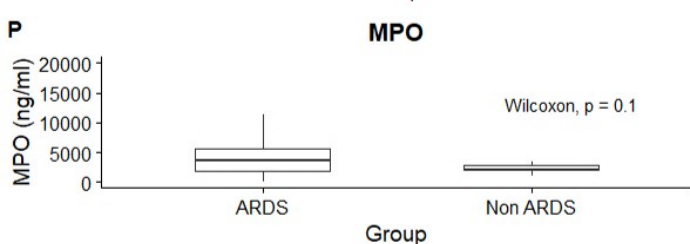

| Specimen      | TNFa  | IL6     | IL8    | IL10  | Ang2     | IFNg  | IL17 | RAGE      | GrB   | sICAM-1   | SPD      | TNFRSF1A | IL18    | MMP-9   | PAI1   | MPO     |
|---------------|-------|---------|--------|-------|----------|-------|------|-----------|-------|-----------|----------|----------|---------|---------|--------|---------|
| ARDS_001_ND1  | 22.4  | 41.4    | 35.1   | 10.6  | 22620.6  | 102.1 | 26.8 | 2100.6    | 127.3 | 309985.3  | 103123.2 | 4756.5   | 350.5   | 13559.9 | 591.6  | 22903.7 |
| ARDS_002_ND1  | 32.7  | 14.4    | 1318.1 | 53.9  | 16103.1  | 111.3 | 15.3 | 684.4     | 150.8 | 940979.6  | 100567.6 | 14935.0  | 1760.2  | 392.4   | 1504.8 | 857.6   |
| ARDS_003_ND1  | 9.3   | 10.6    | 17.0   | 0.0   | 3419.1   | 67.1  | 0.0  | 4725.3    | 113.2 | 434614.2  | 27851.5  | 1372.0   | 435.1   | 1976.7  | 2420.7 | 3667.2  |
| ARDS_004_ND1  | 32.9  | 10649.2 | 9840.6 | 88.8  | 73238.4  | 126.6 | 61.5 | 11189.9   | 452.5 | 916168.0  | 8128.9   | 13644.7  | 2303.3  | 47.3    | 7593.8 | 2839.1  |
| ARDS_005_ND1  | 14.3  | 58.4    | 199.0  | 32.4  | 3551.2   | 55.4  | 5.6  | 12557.2   | 265.1 | 799914.1  | 49921.5  | 3036.0   | 1505.7  | 2716.4  | 3273.1 | 5482.8  |
| ARDS_006_ND1  | 9.5   | 9.6     | 18.8   | 9.0   | 5362.4   | 16.2  | 8.6  | 3862.8    | 63.6  | 427532.1  | 20714.1  | 1103.2   | 257.9   | 486.9   | 988.2  | 2473.4  |
| ARDS_007_ND1  | 9.1   | 13.3    | 730.4  | 13.1  | 1878.0   | 30.2  | 5.6  | 3545.1    | 73.4  | 553128.9  | 34334.2  | 2378.1   | 563.5   | 2316.6  | 995.9  | 5357.7  |
| ARDS_008_ND1  | 20.0  | 21.3    | 41.1   | 12.7  | 9087.0   | 30.3  | 18.2 | 11355.2   | 175.2 | 1050918.0 | 10454.4  | 4710.9   | 2720.5  | 12893.2 | 1115.9 | 33652.2 |
| ARDS_009_ND1  | 25.1  | 3053.8  | 6675.3 | 7.2   | 14914.9  | 130.3 | 19.4 | 1042.6    | 137.7 | 473942.4  | 39912.5  | 3341.2   | 5079.5  | 0.0     | 110.7  | 0.0     |
| ARDS_010_ND1  | 9.4   | 69.1    | 4.6    | 1.6   | 8935.6   | 11.2  | 3.3  | 2673.9    | 31.3  | 299467.4  | 12790.1  | 1563.3   | 279.9   | 2210.3  | 937.5  | 6489.5  |
| ARDS_011_ND1  | 19.6  | 9.6     | 25.9   | 13.9  | 14148.7  | 35.0  | 2.8  | 3737.3    | 357.6 | 813805.8  | 28654.4  | 3745.1   | 1790.5  | 575.8   | 1747.0 | 2771.2  |
| ARDS_012_ND1  | 4.3   | 4.4     | 14.2   | 0.0   | 2420.7   | 4.4   | 0.9  | 4625927.5 | 3.0   | 508387.9  | 28035.0  | 1147.5   | 207.4   | 3843.8  | 1081.2 | 5508.8  |
| ARDS_013_ND1  | 8.6   | 18.4    | 27.0   | 0.0   | 5918.6   | 14.4  | 1.2  | 3642.6    | 10.7  | 518626.1  | 47473.6  | 1497.2   | 49.7    | 9485.0  | 2351.4 | 3601.9  |
| ARDS_014_ND1  | 10.5  | 33.8    | 65.4   | 4.3   | 2453.2   | 19.0  | 3.2  | 4910.8    | 23.5  | 608850.2  | 35204.4  | 2939.2   | 74.3    | 1231.7  | 1461.5 | 5343.6  |
| ARDS_015_ND1  | 4.8   | 15.4    | 16.7   | 0.0   | 1546.4   | 10.1  | 0.1  | 6014.1    | 6.2   | 450993.7  | 13042.7  | 1033.0   | 109.3   | 1787.6  | 966.7  | 1353.0  |
| ARDS_016_ND1  | 16.4  | 657.9   | 320.0  | 4.8   | 4621.0   | 18.8  | 2.6  | 14183.5   | 14.9  | 1236587.4 | 31503.6  | 4163.6   | 418.3   | 331.7   | 599.1  | 1659.5  |
| ARDS_017_ND1  | 11.9  | 25.5    | 51.1   | 13.6  | 5528.4   | 25.2  | 2.9  | 10450.9   | 46.1  | 525761.2  | 13494.6  | 3056.0   | 384.5   | 1738.4  | 3179.1 | 2926.6  |
| ARDS_018_ND1  | 11.0  | 13.8    | 89.2   | 11.4  | 1696.1   | 24.5  | 0.1  | 8666.2    | 77.8  | 748646.5  | 49240.7  | 3428.5   | 543.9   | 1648.5  | 2043.3 | 4884.8  |
| ARDS_019_ND1  | 8.4   | 1.6     | 30.9   | 0.9   | 6003.9   | 14.4  | 0.0  | 3468.9    | 52.1  | 725006.4  | 39340.3  | 1634.2   | 473.9   | 1219.0  | 1935.3 | 2932.2  |
| ARDS_020_ND1  | 5.0   | 4.6     | 27.9   | 0.0   | 1333.9   | 10.1  | 0.1  | 2969.9    | 5.9   | 435297.5  | 14564.9  | 1392.9   | 103.5   | 10526.7 | 2120.5 | 7363.4  |
| ARDS_021_ND1  | 52.1  | 443.2   | 42.3   | 30.3  | 125237.7 | 51.4  | 1.0  | 4334.8    | 105.8 | 1462469.0 | 8946.3   | 16841.3  | 13206.3 | 1454.0  | 1615.7 | 27315.6 |
| ARDS_023_ND1  | 15.5  | 1981.1  | 120.5  | 9.7   | 12869.8  | 22.6  | 6.4  | 18364.1   | 35.3  | 884811.1  | 80236.8  | 4462.5   | 590.3   | 992.7   | 995.0  | 11267.3 |
| ARDS_025_ND1  | 12.9  | 296.4   | 9.4    | 2.0   | 5913.8   | 40.2  | 7.1  | 4167.0    | 73.7  | 522129.9  | 5112.8   | 2792.5   | 564.9   | 11668.6 | 2288.9 | 21172.3 |
| ARDS_026_ND1  | 25.5  | 202.0   | 1897.6 | 6.2   | 4062.6   | 72.9  | 20.5 | 5860.0    | 207.4 | 912801.4  | 52893.3  | 1829.6   | 5827.0  | 0.0     | 1008.9 | 31.7    |
| ARDS_027_ND1  | 34.2  | 201.7   | 565.3  | 21.4  | 6922.4   | 78.5  | 46.2 | 4041.2    | 104.2 | 889351.9  | 37695.6  | 12509.6  | 776.4   | 989.0   | 937.7  | 1081.0  |
| ARDS_029_ND1  | 193.7 | 18517.8 | 5325.8 | 215.4 | 58087.1  | 99.4  | 20.8 | 24592.2   | 524.2 | 1560122.2 | 11256.4  | 22825.4  | 771.3   | 296.0   | 5050.5 | 24741.8 |
| ARDS_030_ND1  | 8.8   | 8.2     | 8.8    | 0.6   | 2502.8   | 19.3  | 5.6  | 992.2     | 31.5  | 230912.5  | 4311.1   | 734.5    | 94.8    | 2549.1  | 961.4  | 1217.7  |
| ARDS_031_ND1  | 12.0  | 113.9   | 11.6   | 4.5   | 11132.6  | 33.2  | 7.1  | 3158.4    | 55.7  | 592662.7  | 16921.9  | 1941.8   | 231.7   | 2175.6  | 644.0  | 6303.8  |
| ARDS_034_ND1  | 16.1  | 29.8    | 114.8  | 2.7   | 3641.9   | 15.8  | 0.0  | 9278.0    | 40.3  | 418110.3  | 36533.7  | 4158.4   | 496.9   | 3316.9  | 1357.0 | 7465.6  |
| ARDS_035_ND1  | 15.7  | 6.7     | 4.7    | 0.4   | 7570.3   | 6.4   | 0.0  | 2553.9    | 28.3  | 609521.3  | 22489.3  | 2876.0   | 376.0   | 1067.0  | 927.4  | 4318.0  |
| ARDS_036_ND1  | 11.9  | 447.3   | 48.8   | 5.5   | 2262.1   | 8.2   | 0.0  | 7175.7    | 60.8  | 779172.1  | 30409.8  | 2366.7   | 483.4   | 927.6   | 1015.9 | 2739.6  |
| ARDS_037_ND1  | 19.0  | 25.3    | 21.4   | 14.8  | 8184.9   | 13.3  | 0.0  | 3151.2    | 108.4 | 475976.6  | 6008.3   | 2788.6   | 236.2   | 1938.8  | 2158.6 | 7413.3  |
| ARDS_038_ND1  | 9.5   | 2.7     | 18.8   | 1.4   | 7256.0   | 13.3  | 0.0  | 1927.9    | 22.9  | 621222.4  | 59352.9  | 2765.3   | 359.7   | 1260.5  | 387.0  | 3486.7  |
| ARDS_039_ND1  | 4.2   | 34.0    | 13.4   | 1.0   | 13405.8  | 17.9  | 3.1  | 16717.3   | 8.9   | 1040443.8 | 33550.6  | 4336.6   | 216.1   | 192.3   | 185.6  | 1815.7  |
| ARDS_040_ND1  | 16.1  | 124.3   | 25.2   | 5.2   | 13662.0  | 15.8  | 9.1  | 6130.7    | 9.8   | 819607.2  | 11067.2  | 3331.1   | 268.3   | 2232.5  | 1028.3 | 5666.4  |
| ARDS_041_ND1  | 12.9  | 220.4   | 15.9   | 6.2   | 5112.2   | 12.9  | 1.7  | 1866.7    | 6.6   | 764218.2  | 18768.2  | 2681.2   | 386.1   | 2084.3  | 1432.2 | 5783.7  |
| ARDS_042_ND1  | 7.2   | 32.9    | 35.2   | 11.7  | 2110.3   | 21.7  | 1.0  | 14573.6   | 33.6  | 563502.7  | 17210.8  | 1590.0   | 312.3   | 1782.4  | 577.0  | 4586.8  |
| ARDS_043_ND1  | 9.4   | 10.6    | 14.1   | 19.3  | 1147.0   | 22.1  | 1.7  | 7177.6    | 60.2  | 676731.0  | 48785.3  | 1447.1   | 332.6   | 637.6   | 1825.6 | 3612.8  |
| ARDS_044_ND1  | 5.8   | 3.9     | 13.9   | 0.8   | 1989.1   | 16.2  | 1.4  | 3292.0    | 18.7  | 485282.5  | 5827.7   | 1377.8   | 167.7   | 5357.1  | 2985.2 | 5522.1  |
| ARDS_045_ND1  | 5.1   | 10.6    | 7.4    | 3.5   | 7598.3   | 14.6  | 12.0 | 3539.8    | 11.2  | 566154.1  | 12603.0  | 1721.4   | 165.0   | 4624.2  | 2098.2 | 3765.4  |
| ARDS_046_ND1  | 7.0   | 6.1     | 7.2    | 48.3  | 2868.8   | 13.8  | 0.0  | 1505.2    | 7.5   | 741457.2  | 16140.6  | 1913.7   | 149.5   | 2430.0  | 1353.7 | 3944.8  |
| CHOP_ARDS_001 | 33.8  | 19.5    | 66.7   | 4.0   | 6707.4   | 9.9   | 0.0  | 16276.5   | 51.0  | 363210.7  | 14747.7  | 3786.5   | 1303.0  | 359.7   | 336.8  | 921.5   |
| CHOP_ARDS_002 | 28.2  | 13.2    | 6.9    | 0.0   | 2817.5   | 11.6  | 0.0  | 6202.9    | 71.7  | 612631.3  | 17242.5  | 2014.3   | 391.7   | 2420.5  | 87.1   | 915.3   |
| CHOP_ARDS_003 | 10.6  | 12.1    | 1.8    | 0.2   | 9009.2   | 10.7  | 0.0  | 3435.3    | 32.4  | 964291.9  | 25335.5  | 1735.9   | 294.0   | 221.7   | 59.7   | 741.4   |
| CHOP_ARDS_005 | 18.1  | 316.4   | 1313.8 | 8.3   | 27054.4  | 26.6  | 0.0  | 2156.3    | 41.0  | 1027977.6 | 29767.8  | 3662.2   | 538.9   | 65.6    | 73.7   | 359.0   |
| CHOP_ARDS_006 | 14.0  | 5.9     | 11.3   | 2.1   | 7133.6   | 16.6  | 0.0  | 2938.0    | 70.2  | 421215.6  | 46625.9  | 1252.7   | 294.7   | 310.4   | 132.5  | 2176.1  |

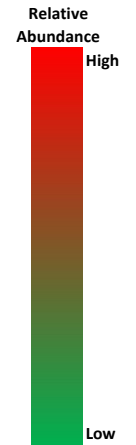

**MMP9 Day 1**

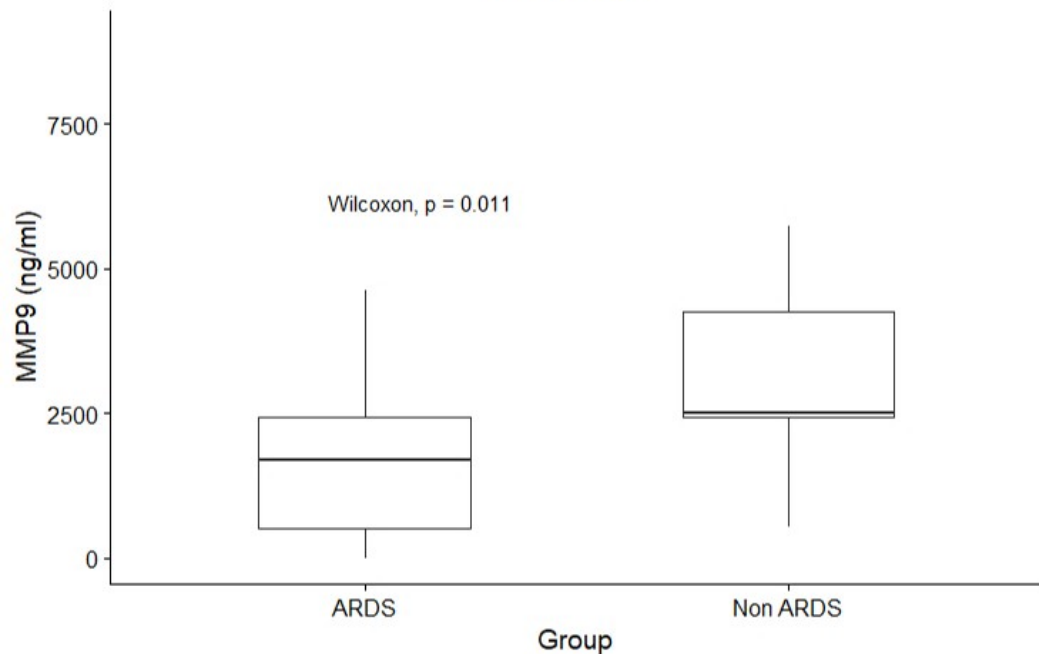

**MMP9 Day 3**

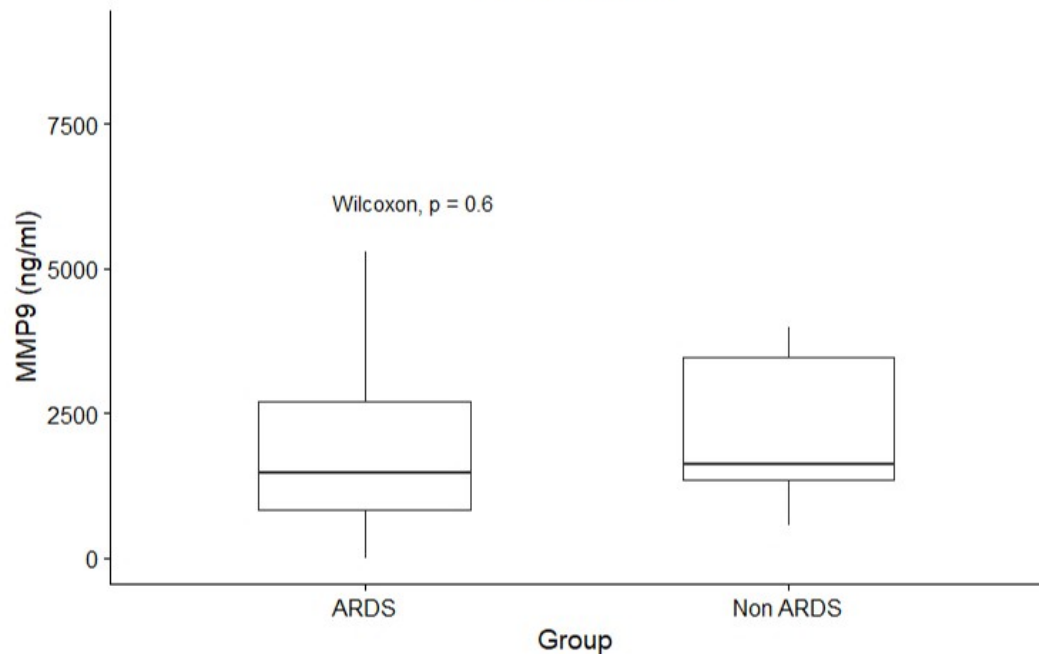

**MMP9 Day 7**

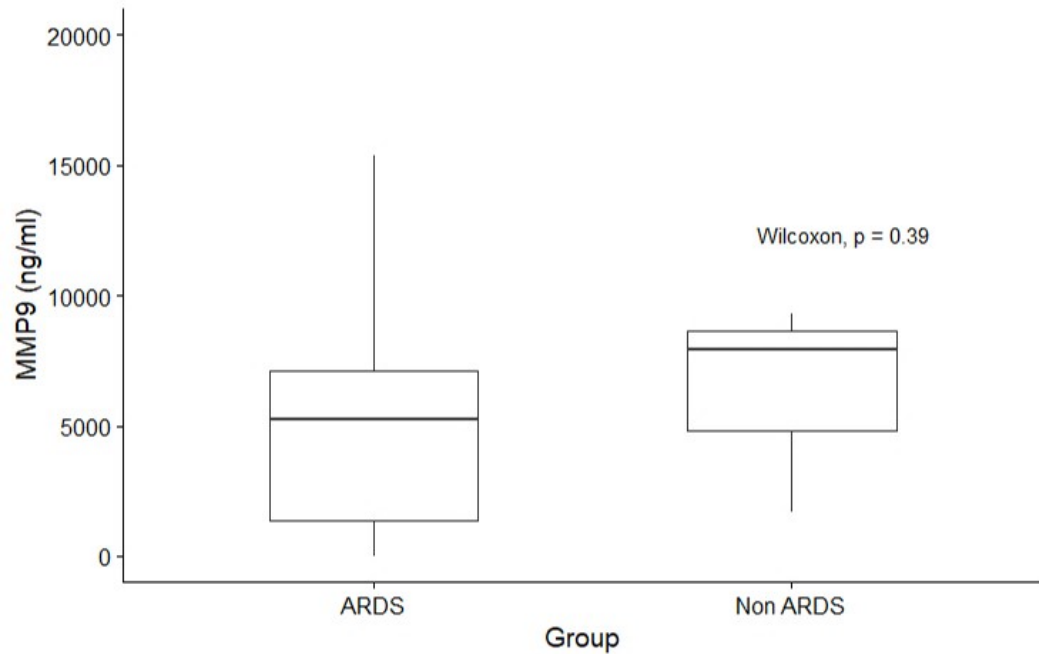

**MMP9 Day 14**

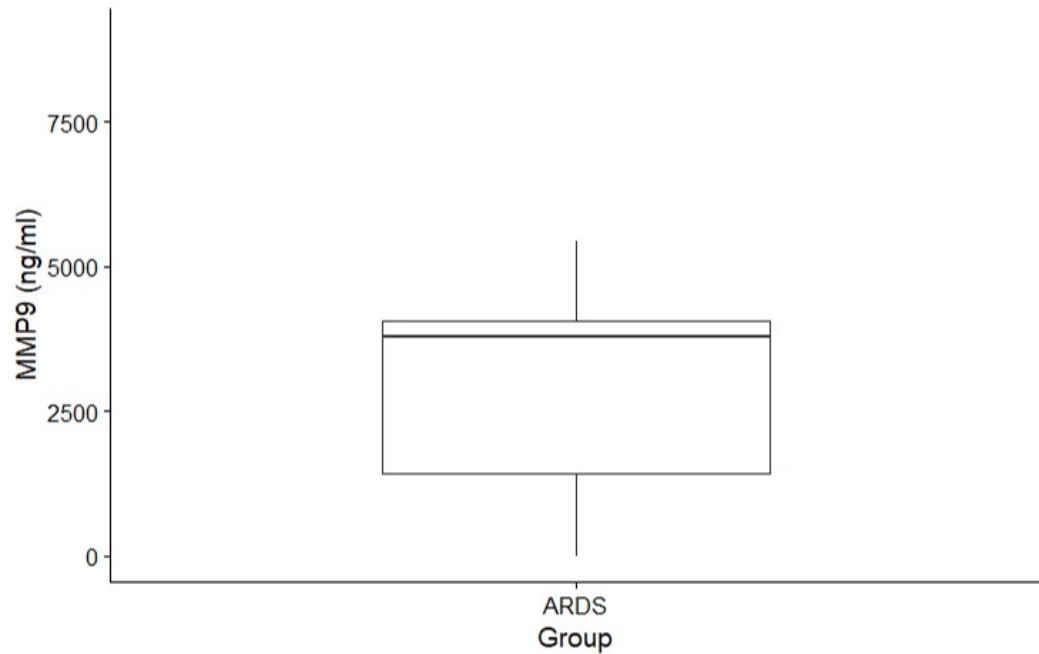



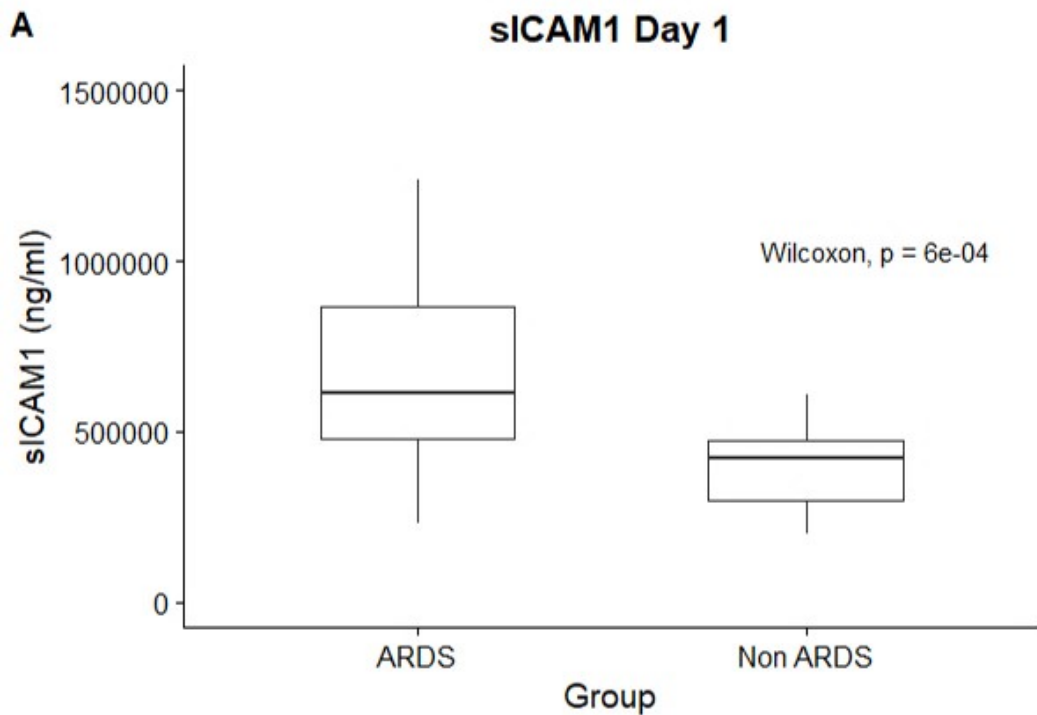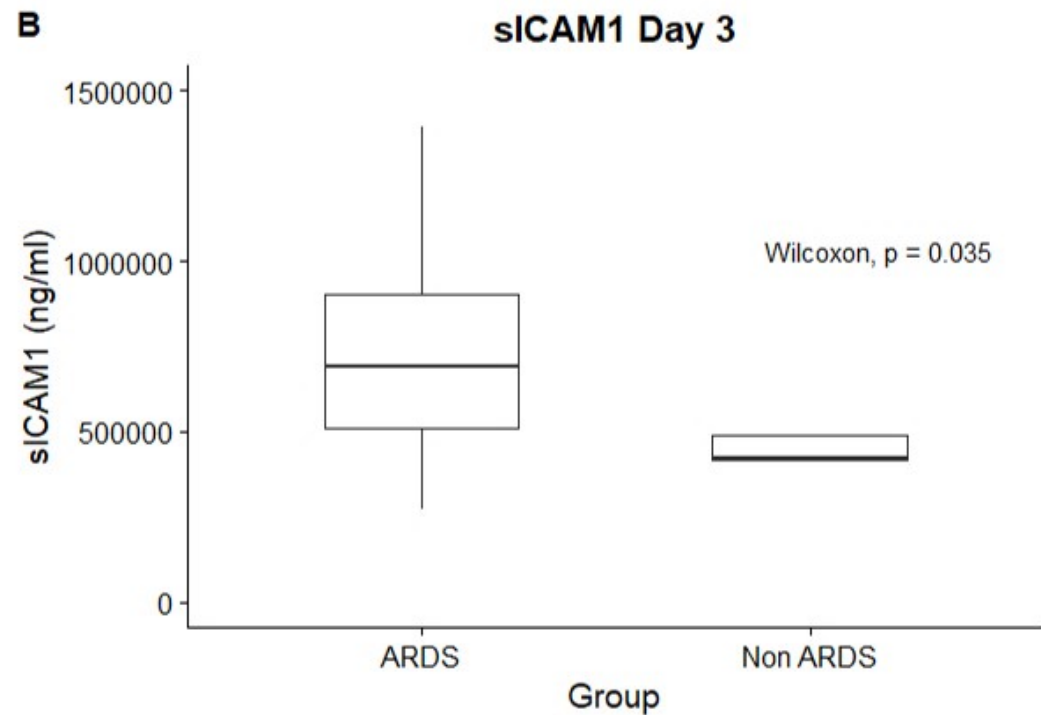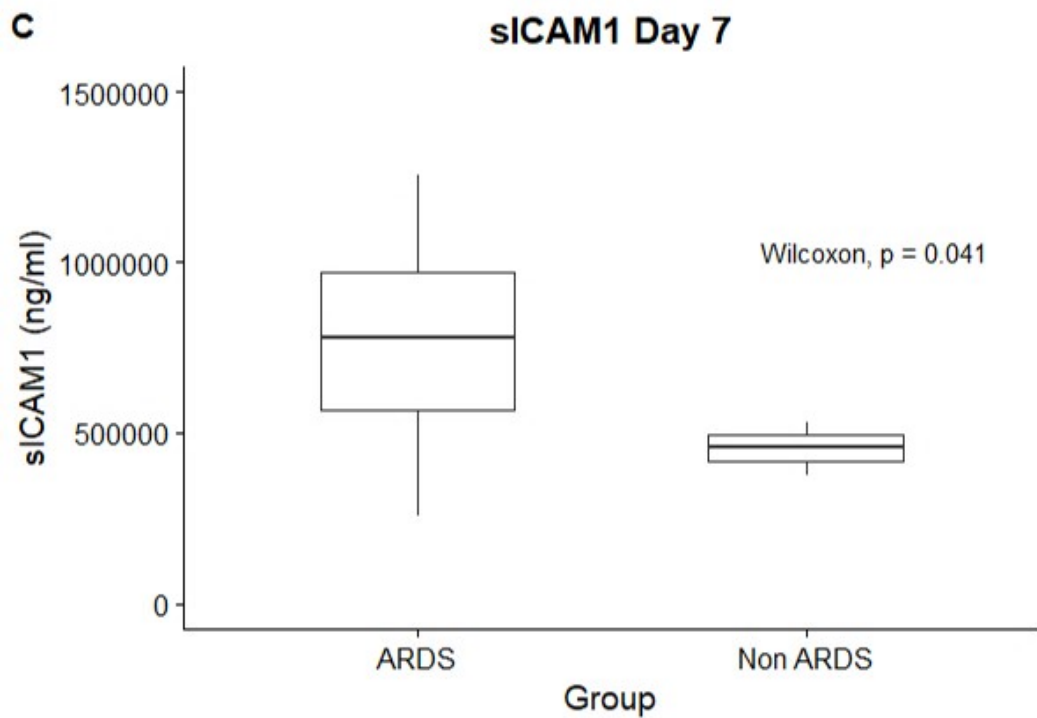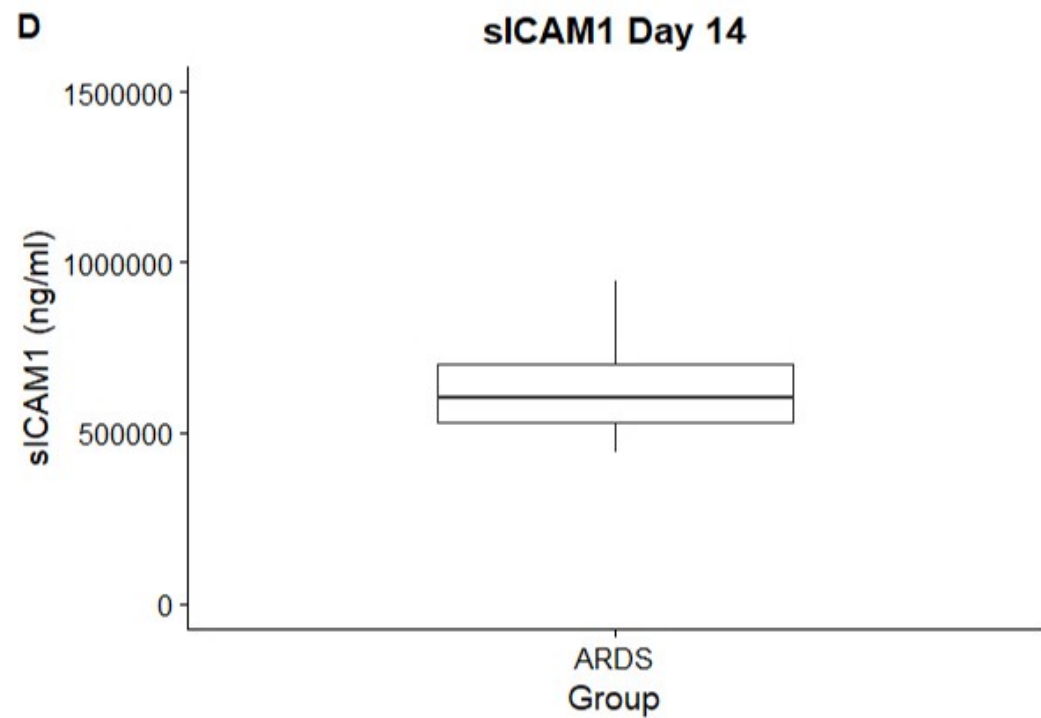

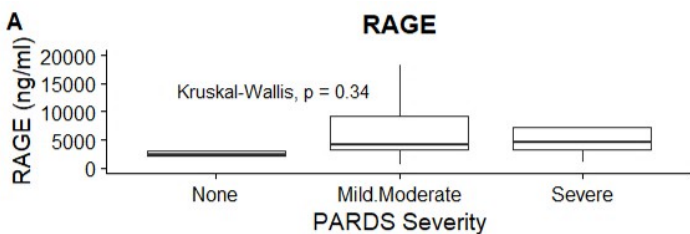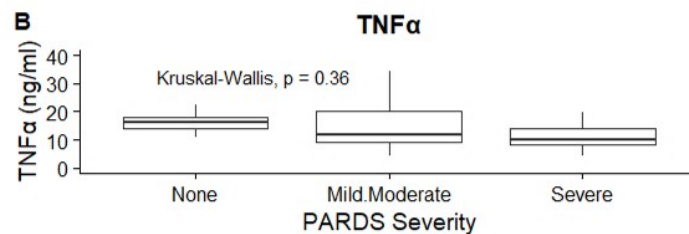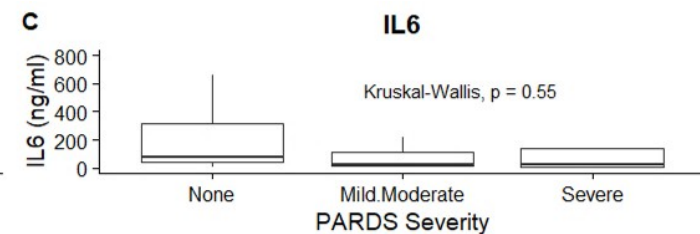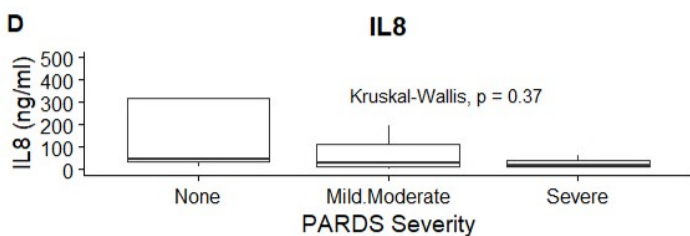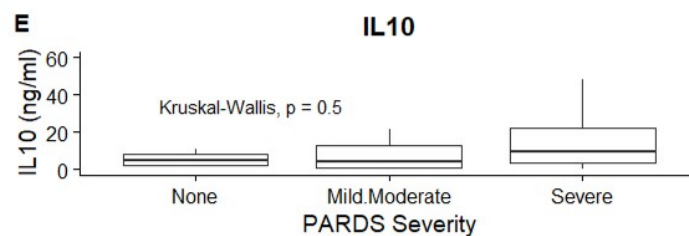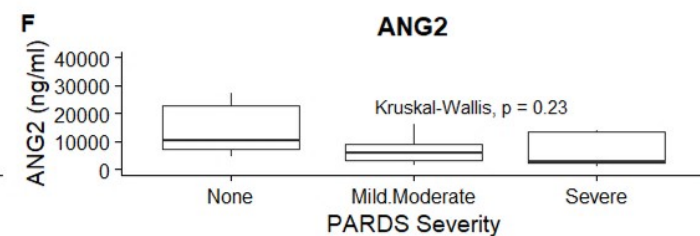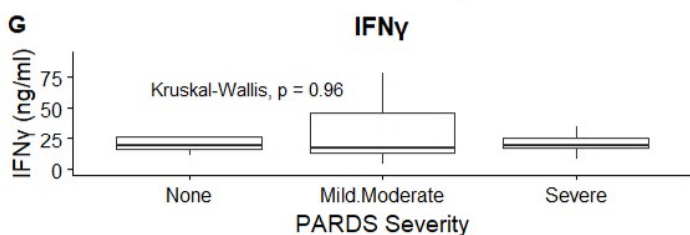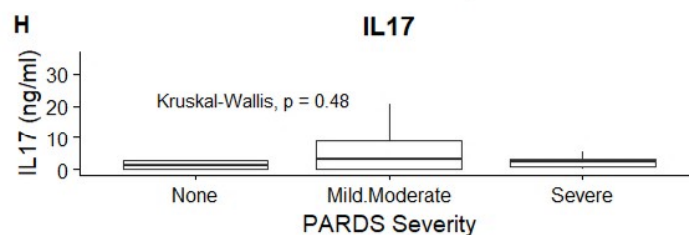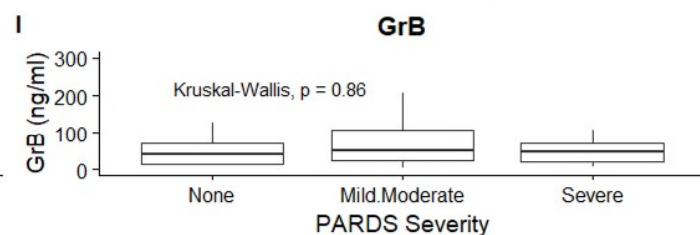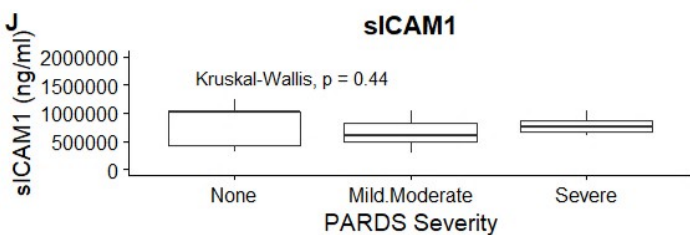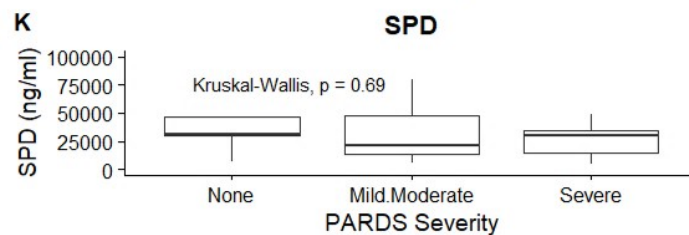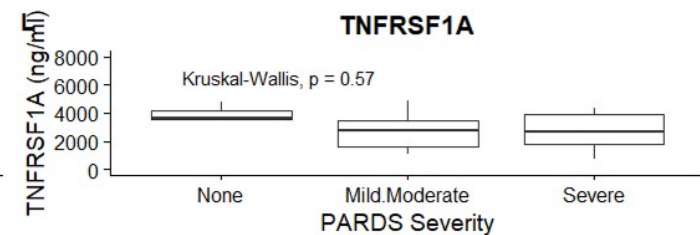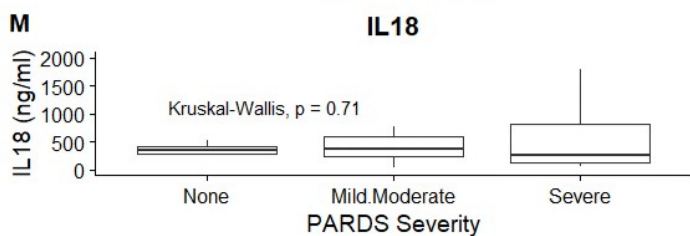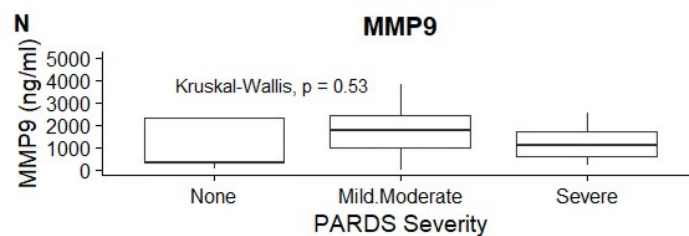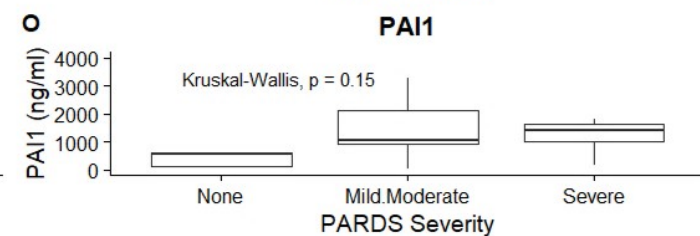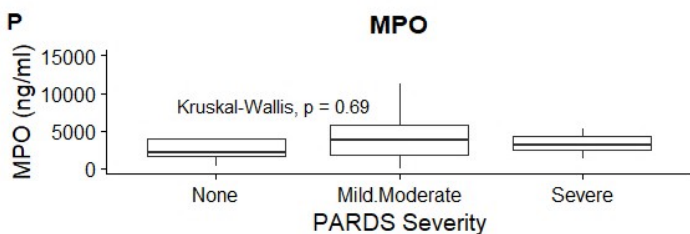

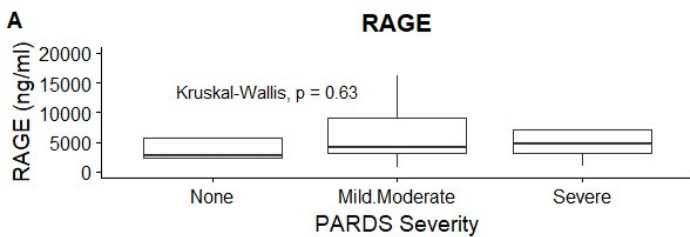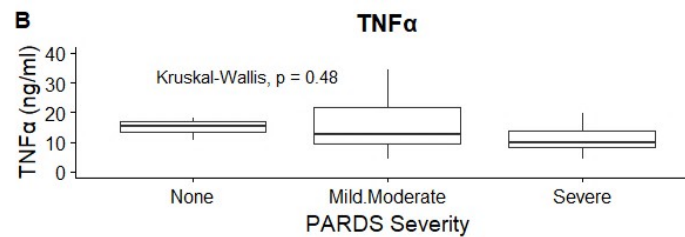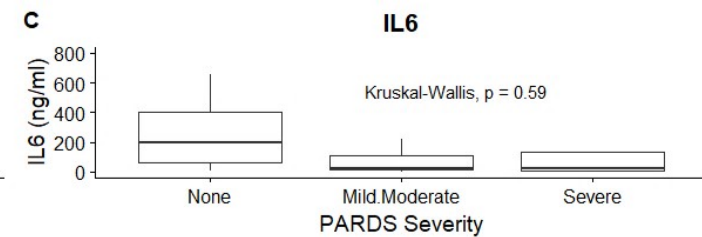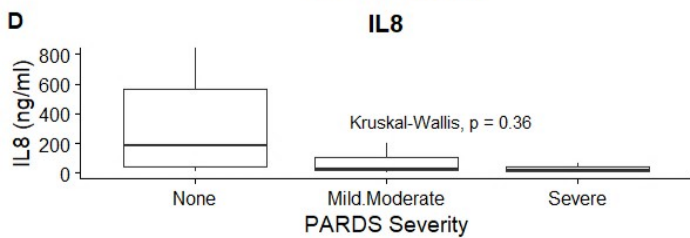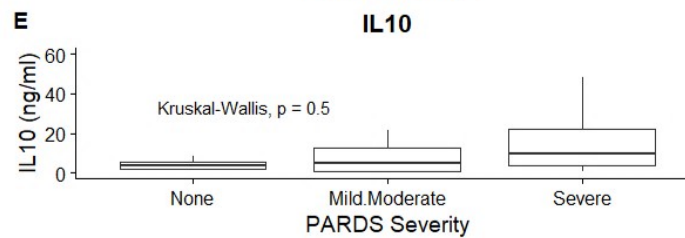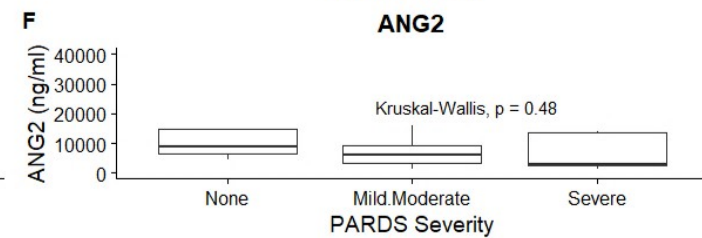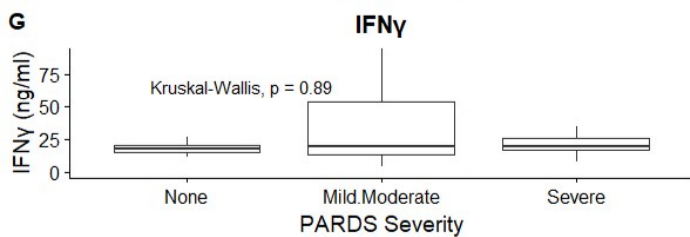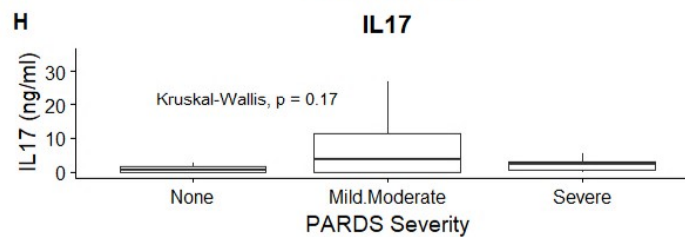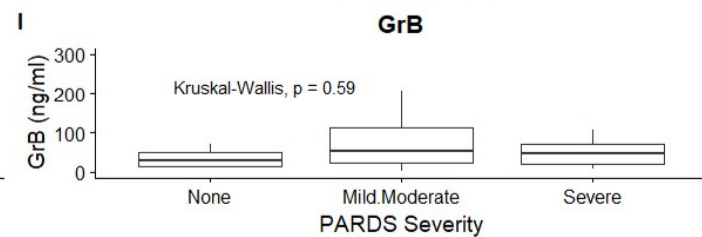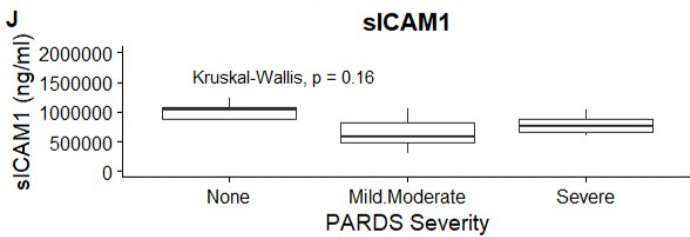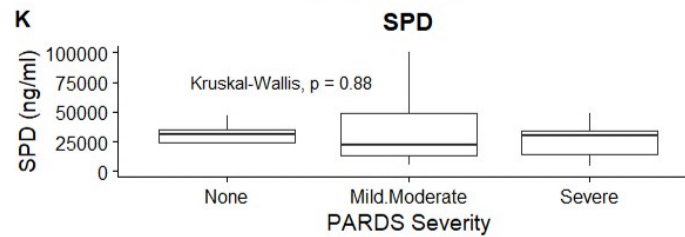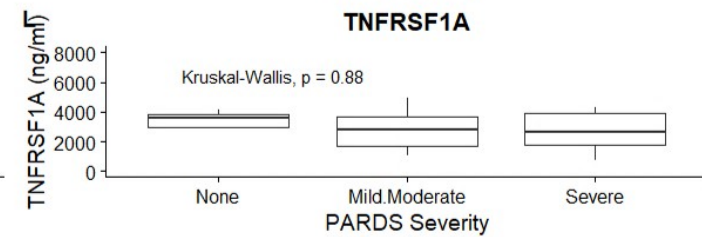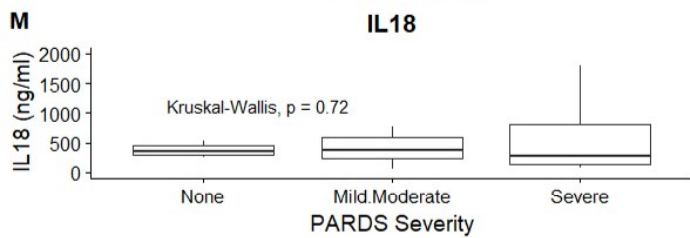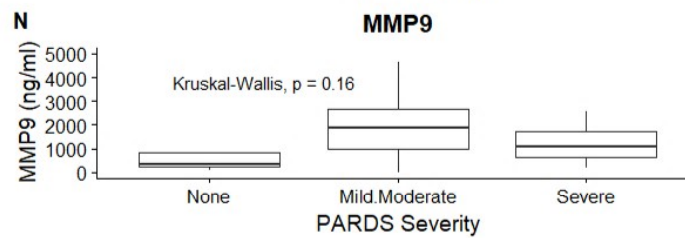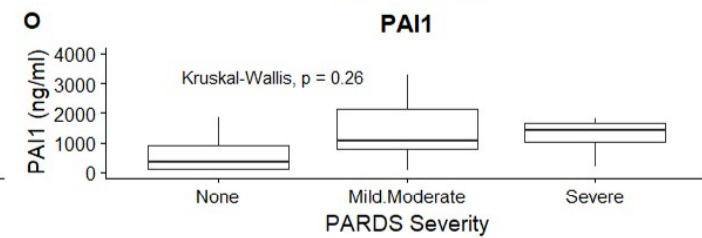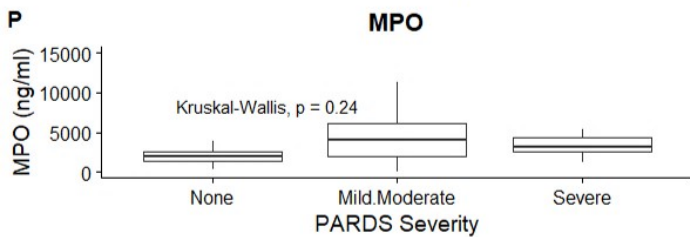

### GrB

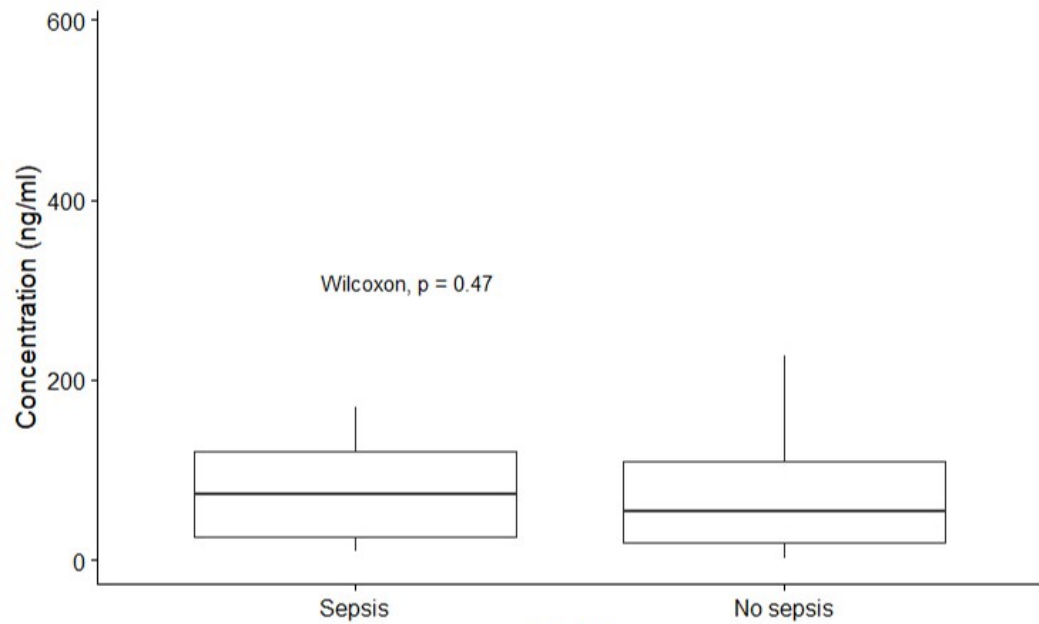

### MPO

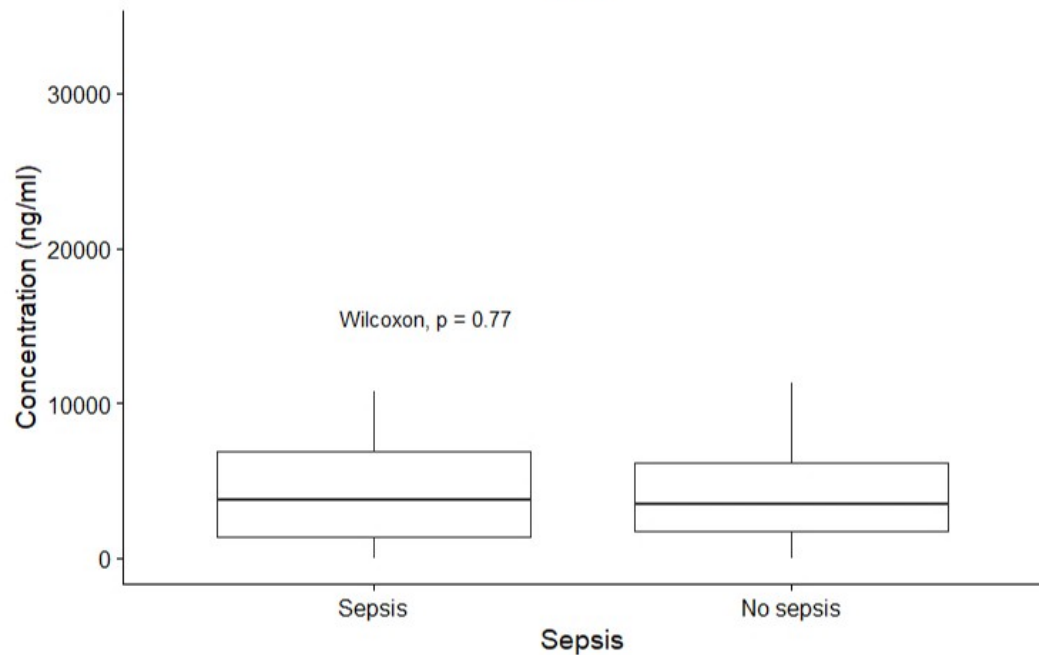

### MMP9

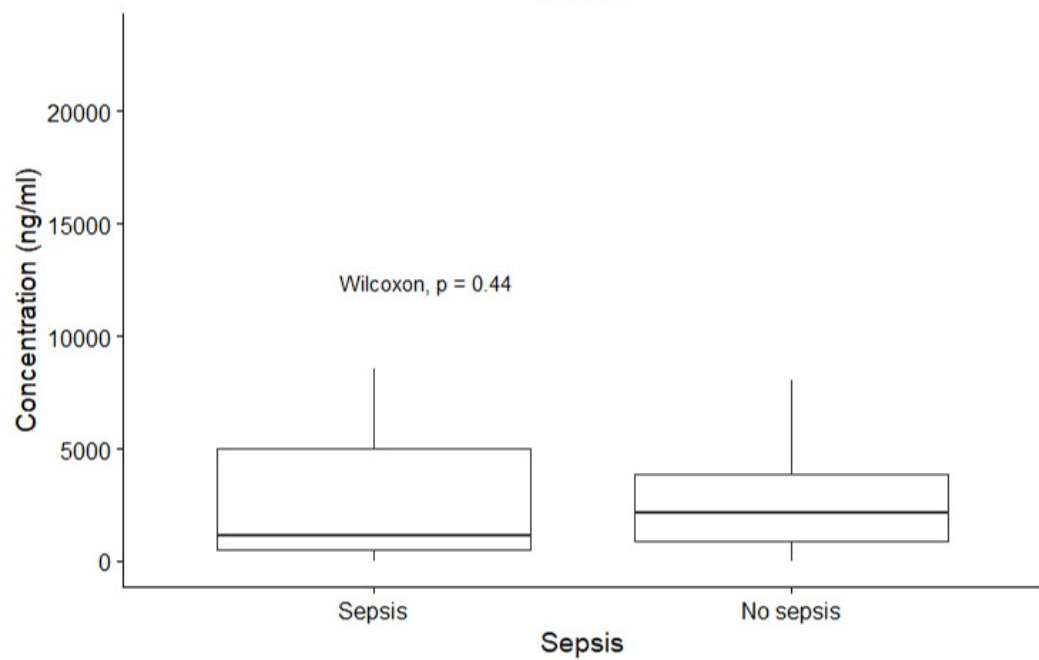

Supplemental Figure 1: Batch Correction of Mean Fluorescent Intensities. Coefficients of variation before batch correction.

Supplemental Figure 2: Batch Correction of Mean Fluorescent Intensities. Coefficients of variation after batch correction.

Supplemental Figure 3: Changes in Biomarker Concentration with Changing OSI. A scatter plot of change in plasma biomarker concentration (ng/mL) and change in oxygenation saturation index (OSI) ( $OSI = \text{mean airway pressure} \times \text{fraction of inspired oxygen (FiO}_2\text{)}/\text{oxygen saturation}$ ). Both R and p values are denoted with 95% confidence interval (CI) denoted by gray shaded area. All biomarkers were significantly and positively correlated with worsening lung injury except RAGE, IL6, IL8, IFN $\gamma$ , and MMP-9. (A) Receptor For Advanced Glycation End Products (RAGE). (B) Tumor Necrosis Factor Alpha (TNF $\alpha$ ). (C) Interleukin-6 (IL6). (D) Interleukin-8 (IL8). (E) Interleukin-10 (IL10). (F) Angiopoietin-2 (ANG2). (G) Interferon- $\gamma$  (IFN $\gamma$ ). (H) Interleukin-17 (IL17). (I) Granzyme B (GrB). (J) Soluble Intercellular Adhesion Molecule-1 (sICAM1). (K) Surfactant Protein D (SPD). (L) TNF Receptor Soluble Factor 1A (TNFRSF1A). (M) Interleukin-18 (IL18). (N) Matrix Metalloproteinase 9 (MMP-9). (O) Plasminogen Activator Inhibitor-1 (PAI1). (P) Myeloperoxidase (MPO).

Supplemental Figure 4: Sensitivity Analysis of Change in Biomarker Concentration with Changing OSI. A scatter plot of change in plasma biomarker concentration (ng/mL) and change in oxygenation saturation index (OSI) ( $OSI = \text{mean airway pressure} \times \text{fraction of inspired oxygen (FiO}_2\text{)}/\text{oxygen saturation}$ ). Both R and p values are denoted with 95% confidence interval (CI) denoted by gray shaded area. All biomarkers were significantly and positively correlated with worsening lung injury except RAGE, IL6, IL8, IFN $\gamma$ , and MMP-9. (A) Receptor For Advanced

Glycation End Products (RAGE). (B) Tumor Necrosis Factor Alpha (TNF $\alpha$ ). (C) Interleukin-6 (IL6). (D) Interleukin-8 (IL8). (E) Interleukin-10 (IL10). (F) Angiotensin-2 (ANG2). (G) Interferon- $\gamma$  (IFN $\gamma$ ). (H) Interleukin-17 (IL17). (I) Granzyme B (GrB). (J) Soluble Intercellular Adhesion Molecule-1 (sICAM1). (K) Surfactant Protein D (SPD). (L) TNF Receptor Soluble Factor 1A (TNFRSF1A). (M) Interleukin-18 (IL18). (N) Matrix Metalloproteinase 9 (MMP-9). (O) Plasminogen Activator Inhibitor-1 (PAI1). (P) Myeloperoxidase (MPO).

Supplemental Figure 5: Day 1 plasma biomarker levels in PARDS (n = 50) and non PARDS (n = 13) subjects. Eight of the sixteen biomarkers tested were significantly higher in PARDS patients compared to non-PARDS patients while one biomarker (MMP9) was significantly higher in non-PARDS patients. Biomarker concentrations are in ng/ml and P-values are noted in plots. (A) Receptor For Advanced Glycation End Products (RAGE). (B) Tumor Necrosis Factor Alpha (TNF $\alpha$ ). (C) Interleukin-6 (IL6). (D) Interleukin-8 (IL8). (E) Interleukin-10 (IL10). (F) Angiotensin-2 (ANG2). (G) Interferon- $\gamma$  (IFN $\gamma$ ). (H) Interleukin-17 (IL17). (I) Granzyme B (GrB). (J) Soluble Intercellular Adhesion Molecule-1 (sICAM1). (K) Surfactant Protein D (SPD). (L) TNF Receptor Soluble Factor 1A (TNFRSF1A). (M) Interleukin-18 (IL18). (N) Matrix Metalloproteinase 9 (MMP-9). (O) Plasminogen Activator Inhibitor-1 (PAI1). (P) Myeloperoxidase (MPO).

Supplemental Figure 6: Sensitivity analysis of Day 1 plasma biomarker levels in PARDS (n = 50) and non PARDS (n = 13) subjects. Eight of the sixteen biomarkers tested were significantly higher in PARDS patients compared to non-PARDS patients while one biomarker (MMP9) was significantly higher in non-PARDS patients. Biomarker concentrations are in ng/ml and P-values are noted in plots. (A) Receptor For Advanced Glycation End Products (RAGE). (B) Tumor Necrosis Factor Alpha (TNF $\alpha$ ). (C) Interleukin-6 (IL6). (D) Interleukin-8 (IL8). (E) Interleukin-10 (IL10). (F) Angiotensin-2 (ANG2). (G) Interferon- $\gamma$  (IFN $\gamma$ ). (H) Interleukin-17 (IL17). (I)

Granzyme B (GrB). (J) Soluble Intercellular Adhesion Molecule-1 (sICAM1). (K) Surfactant Protein D (SPD). (L) TNF Receptor Soluble Factor 1A (TNFRSF1A). (M) Interleukin-18 (IL18). (N) Matrix Metalloproteinase 9 (MMP-9). (O) Plasminogen Activator Inhibitor-1 (PAI1). (P) Myeloperoxidase (MPO).

Supplemental Figure 7: Heatmap of each PARDS subject and biomarker concentration in ng/mL on day 1. PARDS subject 29 had very elevated levels of most biomarkers however most other subjects had no consistent pattern. Biomarkers included: Receptor For Advanced Glycation End Products (RAGE), Tumor Necrosis Factor Alpha (TNF $\alpha$ ), Interleukin-6 (IL6), Interleukin-8 (IL8), Interleukin-10 (IL10), Angiopoietin-2 (ANG2), Interferon- $\gamma$  (IFN $\gamma$ ), Interleukin-17 (IL17), Granzyme B (GrB), Soluble Intercellular Adhesion Molecule-1 (sICAM1), Surfactant Protein D (SPD), TNF Receptor Soluble Factor 1A (TNFRSF1A), Interleukin-18 (IL18), Matrix Metalloproteinase 9 (MMP-9), Plasminogen Activator Inhibitor-1 (PAI1), and Myeloperoxidase (MPO).

Supplemental Figure 8: The concentration of matrix metalloproteinase 9 (MMP-9) in PARDS (n = 50) and critically ill subjects without PARDS (n = 13) on day 1, day 3 (n = 33 PARDS and n = 5 non PARDS), day 7 (n = 25 PARDS and n = 3 non PARDS), and day 14 (n = 13 PARDS and n = 0 non PARDS). MMP-9 was more elevated in the plasma of the non-PARDS subjects on days 1, 3, and 7. This difference was only statistically significant on day 1. Only PARDS subjects were available for sample collection on day 14 as most non PARDS subjects had discharged home. Concentrations are in ng/mL and p values are noted in the graph.

Supplemental Figure 9: The concentration of soluble intercellular adhesion molecule 1 (sICAM1) in PARDS and critically ill subjects without PARDS on day 1 (n = 50 PARDS and n = 13 non

PARDS), day 3 (n = 33 PARDS and n = 5 non PARDS), day 7 (n = 25 PARDS and n = 3 non PARDS), and day 14 (n = 13 PARDS and n = 0 non PARDS). sICAM1 was more elevated in the plasma of PARDS subjects on days 1, 3, and 7, and was statistically significant. Only PARDS subjects were available for sample collection on day 14 as most non PARDS subjects had discharged home. Concentrations are in ng/mL and p values are noted in the graph.

Supplemental Figure 10: The correlation between day 1 plasma biomarker concentration and day 1 PARDS severity in PARDS (n = 50) subjects. There was no statistically significant correlation between biomarker concentration and severity for any of the biomarkers we tested. (A) Receptor For Advanced Glycation End Products (RAGE). (B) Tumor Necrosis Factor Alpha (TNF $\alpha$ ). (C) Interleukin-6 (IL6). (D) Interleukin-8 (IL8). (E) Interleukin-10 (IL10). (F) Angiopoietin-2 (ANG2). (G) Interferon- $\gamma$  (IFN $\gamma$ ). (H) Interleukin-17 (IL17). (I) Granzyme B (GrB). (J) Soluble Intercellular Adhesion Molecule-1 (sICAM1). (K) Surfactant Protein D (SPD). (L) TNF Receptor Soluble Factor 1A (TNFRSF1A). (M) Interleukin-18 (IL18). (N) Matrix Metalloproteinase 9 (MMP-9). (O) Plasminogen Activator Inhibitor-1 (PAI1). (P) Myeloperoxidase (MPO).

Supplemental Figure 11: Sensitivity analysis of the correlation between day 1 biomarker level and day 1 PARDS severity in PARDS (n = 50) subjects. There was no correlation between biomarkers concentration and PARDS severity. (A) Receptor For Advanced Glycation End Products (RAGE). (B) Tumor Necrosis Factor Alpha (TNF $\alpha$ ). (C) Interleukin-6 (IL6). (D) Interleukin-8 (IL8). (E) Interleukin-10 (IL10). (F) Angiopoietin-2 (ANG2). (G) Interferon- $\gamma$  (IFN $\gamma$ ). (H) Interleukin-17 (IL17). (I) Granzyme B (GrB). (J) Soluble Intercellular Adhesion Molecule-1 (sICAM1). (K) Surfactant Protein D (SPD). (L) TNF Receptor Soluble Factor 1A (TNFRSF1A). (M) Interleukin-18 (IL18). (N) Matrix Metalloproteinase 9 (MMP-9). (O) Plasminogen Activator Inhibitor-1 (PAI1). (P) Myeloperoxidase (MPO).



Supplemental Figure 12: Concentrations of granzyme B (GrB), myeloperoxidase (MPO), and matrix metalloproteinase 9 (MMP-9) in PARDS patients with sepsis and without sepsis across all study time points. There was no difference in any of the three biomarkers between groups. Biomarker concentrations are in ng/ml and p values are noted on the plots.
